1 **Generation and Characterization of recombinant SARS-CoV-2 expressing reporter**  
2 **genes**

3 Kevin Chiem<sup>1</sup>, Desarey Morales Vasquez<sup>1</sup>, Jun-Gyu Park<sup>1</sup>, Roy Neal Platt<sup>1</sup>, Tim  
4 Anderson<sup>1</sup>, Mark R. Walter<sup>2</sup>, James J. Kobie<sup>3</sup>, Chengjin Ye<sup>1#</sup>, Luis Martinez-Sobrido<sup>1#</sup>

5  
6 <sup>1</sup> Texas Biomedical Research Institute, San Antonio, TX, USA.

7 <sup>2</sup> Department of Microbiology, University of Alabama at Birmingham, Birmingham, AL,  
8 USA.

9 <sup>3</sup> Department of Medicine, Division of Infectious Diseases, University of Alabama at  
10 Birmingham, Birmingham, AL, USA

11

12 # Corresponding authors:

13 Luis Martinez-Sobrido ([lmartinez@txbiomed.org](mailto:lmartinez@txbiomed.org))

14 Chengjin Ye ([cye@txbiomed.org](mailto:cye@txbiomed.org))

15 Texas Biomedical Research Institute

16 8715 Military Dr.

17 San Antonio, Texas, 78277

18

19

20

21

22

23 **Running title:** Reporter expressing rSARS-CoV-2

24        **Abstract**

25        The emergence of severe acute respiratory syndrome coronavirus 2 (SARS-CoV-2),  
26 the pathogen responsible of coronavirus disease 2019 (COVID-19), has devastated  
27 public health services and economies worldwide. Despite global efforts to contain the  
28 COVID-19 pandemic, SARS-CoV-2 is now found in over 200 countries and has caused  
29 an upward death toll of over 1 million human lives as of November 2020. To date, only  
30 one Food and Drug Administration (FDA)-approved therapeutic drug (Remdesivir) and a  
31 monoclonal antibody, MAb (Bamlanivimab), but no vaccines, are available for the  
32 treatment of SARS-CoV-2. As with other viruses, studying SARS-CoV-2 requires the  
33 use of secondary approaches to detect the presence of the virus in infected cells. To  
34 overcome this limitation, we have generated replication-competent recombinant  
35 (r)SARS-CoV-2 expressing fluorescent (Venus or mCherry) or bioluminescent (Nluc)  
36 reporter genes. Vero E6 cells infected with reporter-expressing rSARS-CoV-2 can be  
37 easily detected via fluorescence or luciferase expression and display a good correlation  
38 between reporter gene expression and viral replication. Moreover, rSARS-CoV-2  
39 expressing reporter genes have comparable plaque sizes and growth kinetics to those  
40 of wild-type virus, rSARS-CoV-2/WT. We used these reporter-expressing rSARS-CoV-2  
41 to demonstrate their feasibility to identify neutralizing antibodies (NAbs) or antiviral  
42 drugs. Our results demonstrate that reporter-expressing rSARS-CoV-2 represent an  
43 excellent option to identify therapeutics for the treatment of SARS-CoV-2, where  
44 reporter gene expression can be used as valid surrogates to track viral infection.  
45 Moreover, the ability to manipulate the viral genome opens the feasibility of generating

46 viruses expressing foreign genes for their use as vaccines for the treatment of SARS-  
47 CoV-2 infection.

#### 48 **Importance**

49 Severe acute respiratory syndrome coronavirus 2 (SARS-CoV-2), the pathogen that  
50 causes coronavirus disease 2019 (COVID-19), has significantly impacted the human  
51 health and economic status worldwide. There is an urgent need to identify effective  
52 prophylactics and therapeutics for the treatment of SARS-CoV-2 infection and  
53 associated COVID-19 disease. The use of fluorescent- or luciferase-expressing reporter  
54 expressing viruses has significantly advanced viral research. Here, we generated  
55 recombinant (r)SARS-CoV-2 expressing fluorescent (Venus and mCherry) or luciferase  
56 (Nluc) reporter genes and demonstrate that they represent an excellent option to track  
57 viral infections *in vitro*. Importantly, reporter-expressing rSARS-CoV-2 display similar  
58 growth kinetics and plaque phenotype that their wild-type counterpart (rSARS-CoV-  
59 2/WT), demonstrating their feasibility to identify drugs and/or neutralizing antibodies  
60 (NAbs) for the therapeutic treatment of SARS-CoV-2. Henceforth, these reporter-  
61 expressing rSARS-CoV-2 can be used to interrogate large libraries of compounds  
62 and/or monoclonal antibodies (MAb), in high-throughput screening settings, to identify  
63 those with therapeutic potential against SARS-CoV-2.

64

65

66

67

68

69

70

## 71 **Introduction**

72 Late in 2019, a previously unknown coronavirus, severe acute respiratory syndrome  
73 coronavirus 2 (SARS-CoV-2), was identified in Wuhan, China (1). Since then, SARS-  
74 CoV-2 has become responsible for the global pandemic of coronavirus disease 2019  
75 (COVID-19) (1). As of November 2020, SARS-CoV-2 has spread worldwide and it has  
76 been responsible of over 40 million confirmed cases and around 1.1 million deaths (2).  
77 To date, only one United States (US) Food and Drug Administration (FDA)-approved  
78 therapeutic antiviral drug, Remdesivir, and a monoclonal antibody, MAb (Bamlanivimab)  
79 are available for the treatment of SARS-CoV-2 infections (3). No FDA-approved  
80 prophylactics (vaccines) are currently available against SARS-CoV-2.

81 SARS-CoV-2 is a single-stranded, positive-sense RNA *Betacoronavirus* that belongs  
82 to the *Coronaviridae* family. Prior to SARS-CoV-2, only six coronavirus (CoVs) species  
83 were known to cause disease in humans (4). Of the six, four human (h)CoVs are  
84 prevalent and responsible of causing common cold in immunocompetent individuals  
85 (hCoV-229E, hCoV-OC43, hCoV-NL63, and hCoV-HKU1) (4, 5). The two other CoVs,  
86 severe acute respiratory syndrome coronavirus (SARS-CoV) and Middle East  
87 respiratory syndrome coronavirus (MERS-CoV), have been associated with severe  
88 illness and significant morbidity and mortality (6). SARS-CoV was responsible for an  
89 outbreak of severe acute respiratory syndrome in 2002-2003 in Guangdong Province,  
90 China, with a fatality rate of around 9.5% (7). MERS-CoV was responsible for an  
91 outbreak of severe respiratory disease in 2012-2013 in the Middle East, with a fatality

92 rate of around 30% (4, 5, 8). SARS-CoV-2 has a viral genome of approximately 30,000  
93 nucleotides in length and high similarity to that of SARS-CoV (~79%) and lower to  
94 MERS-CoV (~50%), with an overall fatality rate of 3.4%, but can as high as 49% in  
95 critically ill patients, making the COVID-19 pandemic rival that of the “Spanish flu” in  
96 1918-1919 (9-13).

97 Studying SARS-CoV-2 in laboratories require the use of secondary approaches to  
98 identify the presence of virus in infected cells. The ability to generate recombinant  
99 viruses using reverse genetics approaches represents a powerful tool to answer  
100 important questions in the biology of viral infections, including mechanisms of viral  
101 infection, pathogenesis and disease. In addition, the use of reverse genetics techniques  
102 have offered the possibility to generate recombinant viruses expressing reporter genes  
103 for their use in cultured cells or *in vivo* models of infection where reporter gene  
104 expression can be used as a valid surrogate to identify the presence of the virus in  
105 infected cells (14, 15). Importantly, these reporter-expressing recombinant viruses also  
106 represent an excellent tool for the easy and rapid identification of drugs for the  
107 prophylactic or therapeutic treatment of viral infections, by allowing high-throughput  
108 screening (HTS) approaches to interrogate large libraries of biologicals exhibiting  
109 antiviral activity.

110 Several manuscripts have described the ability to generate recombinant (r)SARS-  
111 CoV-2 expressing fluorescent (mNeonGreen and GFP) or bioluminescent (Nluc)  
112 reporter genes (16-18). However, these reverse genetics protocols require laborious *in*  
113 *vitro* assembly and transcription steps prior to transfecting cells, an inconvenience that  
114 should be considered due to the laborious nature and restraint of these methods. Here,

115 we describe the generation and characterization of replication-competent rSARS-CoV-2  
116 expressing fluorescent Venus or mCherry, or bioluminescent Nluc reporter genes using  
117 our recently described bacterial artificial chromosome (BAC)-based reverse genetics  
118 approach (19, 20). In Vero E6 cells, rSARS-CoV-2 expressing reporter genes have  
119 similar growth kinetics and plaque phenotype than that of wild-type virus (rSARS-CoV-  
120 2/WT). Importantly, we have observed a correlation between reporter gene expression  
121 and viral replication (19), and infected cells can be easily detected, without the need of  
122 secondary approaches, based on reporter gene expression. Using these reporter-  
123 expressing rSARS-CoV-2, we have developed fluorescent-based microneutralization  
124 assays that can be used to identify neutralizing antibodies (NAbs) and/or antivirals. The  
125 neutralization titers and inhibitory activities of NAbs or antivirals, respectively, obtained  
126 in our reporter-based microneutralization assays were similar to those observed in  
127 classical microneutralization assays using rSARS-CoV-2/WT (21). These results  
128 demonstrate that our reporter-expressing rSARS-CoV-2 represent an excellent tool for  
129 studying the biology of the virus and for the identification of therapeutics for the  
130 treatment of SARS-CoV-2 and also for *in vivo* studies. Furthermore, because of reporter  
131 gene expression, these rSARS-CoV-2 expressing reporter genes represent an ideal  
132 option to screen large libraries of biologicals to identify those with antiviral activity. Our  
133 results also demonstrate the feasibility of generating rSARS-CoV-2 expressing foreign  
134 genes that could be used to generate vaccines for the treatment of SARS-CoV-2  
135 infections and/or associated COVID-19 disease.

136

137

138

139

140

141

## 142 **Materials and Methods**

### 143 **Biosafety**

144 All experiments involving infectious SARS-CoV-2 were performed in a biosafety level  
145 3 (BSL3) laboratory at the Texas Biomedical Research Institute. Protocols containing  
146 SARS-CoV-2 were approved by the Texas Biomedical Research Institute's Institutional  
147 Biosafety Committee (IBC).

### 148 **Cell lines**

149 African green monkey kidney epithelial cells (Vero E6, CRL-1586) were grown and  
150 maintained in Dulbecco's modified Eagle's medium (DMEM) supplemented with 10%  
151 fetal bovine serum (FBS) and 1% PSG (100 units/ml penicillin, 100 µg/ml streptomycin,  
152 and 2 mM L-glutamine), at 37°C with 5% CO<sub>2</sub>.

### 153 **Generation of pBeloBAC11-SARS-CoV-2 encoding reporter genes**

154 The pBeloBAC11 plasmid (NEB) containing the entire viral genome of SARS-CoV-2  
155 has been previously described (19, 22). Briefly, the entire genome sequence of SARS-  
156 CoV-2 USA/WA1/2020 (GenBank accession no. MN985325) was chemically  
157 synthesized (Bio Basic) in five fragments and cloned into pUC57 plasmids containing  
158 unique restriction sites. Silent mutations were introduced to the spike (S) and matrix (M)  
159 genes to remove BstBI and MluI restriction sites, respectively, that were used for the  
160 assembly of the entire SARS-CoV-2 genome into the pBeloBAC11 plasmid. These

161 nucleotide changes were also used as genetic markers to distinguish the natural  
162 USA/WA1/2020 and the recombinant SARS-CoV-2 (19). The five fragments containing  
163 the entire SARS-CoV-2 genome were assembled into the pBeloBAC11 using standard  
164 molecular biology techniques. To remove the 7a gene and introduce the Venus,  
165 mCherry, or Nluc reporter genes, the region flanking the 7a viral gene and each  
166 individual reporter genes were amplified by extension and overlapping PCR using  
167 specific oligonucleotides in a shuttle plasmid. The modified 7a viral genes were inserted  
168 into the pBeloBAC11 plasmid containing the remaining SARS-CoV-2 viral genome  
169 using BamHI and RsrII restriction sites to generate pBeloBAC11-SARS-CoV-2-  
170 del7a/Venus, pBeloBAC11-SARS-CoV-2-del7a/mCherry, and pBeloBAC11-SARS-CoV-  
171 2-del7a/Nluc for the rescue of rSARS-CoV-2-Venus, rSARS-CoV-2-mCherry and  
172 rSARS-CoV-2-Nluc, respectively. Plasmids and pBeloBAC11 constructs were validated  
173 by Sanger sequencing (ACGT Inc).

#### 174 **Rescue of rSARS-CoV-2 expressing reporter genes**

175 The rSARS-CoV-2/WT and rSARS-CoV-2 expressing reporter genes were rescued  
176 as previously described (19, 20). Briefly, confluent monolayers of Vero E6 cells (1.2 x  
177 10<sup>6</sup> cells/well, 6-well plate format, triplicates) were transfected, using lipofectamine 2000  
178 (LPF2000, Thermo Fisher) with 4 µg/well of pBeloBAC11-SARS-CoV-2/WT,  
179 pBeloBAC11-SARS-CoV-2-del7a/Venus, -del7a/mCherry, or -del7a/Nluc plasmids. An  
180 empty pBeloBAC11 plasmid was included as internal control. At 14 h, transfection  
181 media was replaced with post-infection media (DMEM with 2% FBS) and, 24 h later,  
182 cells were scaled up into T75 flasks. At 72 h, P0 virus-containing tissue culture  
183 supernatants were collected and stored at -80°C. Viral rescues were confirmed by



184 infecting fresh Vero E6 cells ( $1.2 \times 10^6$  cells/well, 6-wel plates, triplicates) and assessing  
185 fluorescence or Nluc expression. P0 viruses were passaged three times and viral stocks  
186 were generated and titrated for *in vitro* experiments. Viral titers (plaque forming units per  
187 milliliter; PFU/ml) were determined by plaque assay in Vero E6 cells ( $1.2 \times 10^6$   
188 cells/well, 6-well plate format).

## 189 **Sequencing**

190 Viral RNAs from Vero E6 cells ( $1.2 \times 10^6$  cells/well, 6-well plate format) infected at  
191 multiplicity of infection (MOI) of 0.01 were extracted using TRIzol reagent (Thermo  
192 Fisher Scientific), according to the manufacturer's specifications. Libraries were  
193 generated with a KAPA RNA HyperPrep kit, 100 ng of RNA, and 7 mM of adapter. The  
194 Illumina HiSeq X was used for sequencing. Raw reads were filtered using Trimmomatic  
195 v0.39 (23). SARS-CoV-2 templates were made for each reporter gene by modifying  
196 SARS-CoV-2 USA/WA1/2020 (Genbank Accession: MN985325.1). Modifications  
197 included deleting orf7a, adding T21895C and T26843A mutations, and inserting the  
198 appropriate reporter gene (Venus, mCherry, or Nluc) at pos 27937. Reads were  
199 mapped to the modified SARS-CoV-2 templates with Bowtie v2.4.1 (24), and the total  
200 genomic coverage was quantified using MosDepth v0.2.6 (25). Allele frequencies were  
201 estimated with LoFreq\* v2.1.3.1 (26) and low frequency variants with less than a 100x  
202 read depth or a 1% minor allele frequency were eliminated. All sequence data has been  
203 deposited in the NCBI Short Read Archive (BioProject: PRJNA678001).

## 204 **RT-PCR**

205 Total RNA from Vero E6 cells ( $1.2 \times 10^6$  cells/well, 6-well plate format) mock- or  
206 virus-infected (MOI of 0.01) were extracted using TRIzol reagent (Thermo Fisher

207 Scientific). Superscript® II Reverse Transcriptase (Invitrogen) and Expand high-fidelity  
208 PCR (Sigma-Aldrich) were used to synthesize and amplify the cDNAs, respectively,  
209 using primers specific for the viral nucleoprotein (NP) or ORF7a region; and Venus,  
210 mCherry, or Nluc.

### 211 **Immunofluorescence assays (IFA)**

212 Confluent monolayers of Vero E6 cells ( $1.2 \times 10^6$  cells/well, 6-well format, triplicates)  
213 were mock-infected or infected (MOI of 0.01) with rSARS-CoV-2 expressing Venus or  
214 mCherry, or rSARS-CoV-2/WT. At 48 h post-infection, cells were fixed with 10% neutral  
215 buffered formalin at 4°C for 16 h for fixation and viral inactivation, and permeabilized  
216 with phosphate-buffered saline (PBS) containing 0.5% (vol/vol) Triton X-100 for 5 min at  
217 room temperature. Cells were washed with PBS and blocked with 2.5% bovine albumin  
218 serum (BSA) in PBS for 1 h before incubation with 1 µg/ml of SARS-CoV anti-NP MAb  
219 1C7 in 1% BSA in PBS for 1 h at 37°C. Cells infected with rSARS-CoV-2-Venus or -  
220 mCherry were washed with PBS and stained with either Alexa Fluor 594 goat anti-  
221 mouse IgG (Invitrogen; 1:1000) or fluorescein isothiocyanate (FITC)-conjugated goat  
222 anti-mouse IgG (Dako; 1:200), respectively. Cell nuclei were stained with 4',6'-  
223 diamidino-2-phenylindole (DAPI, Research Organics). Representative images were  
224 captured using a fluorescence microscope (EVOS M5000 imaging system) at 20X  
225 magnification.

### 226 **Protein gel electrophoresis and Western blots**

227 Vero E6 cells ( $1.2 \times 10^6$  cells/well, 6-well plate format, triplicates) were mock-infected  
228 or infected (MOI of 0.01) with rSARS-CoV-2/WT or rSARS-CoV-2 expressing Venus,  
229 mCherry, or Nluc. At 48 h post-infection, cells were lysed with 1X passive lysis buffer

230 (Promega) and proteins were separated by denaturing electrophoresis in 12% SDS-  
231 polyacrylamide gels and transferred to a nitrocellulose membrane (Bio-Rad) with a Mini-  
232 Protean Tetra Vertical Electrophoresis Cell at 100V for 1 h at 4°C. Membranes were  
233 blocked in PBS containing 10% dried skim milk and 0.1% Tween 20 for 1 h and then  
234 incubated overnight at 4°C with the following primary MAbs or polyclonal antibodies  
235 (PABs): SARS-CoV NP (mouse MAb 1C7; Dr. Thomas Moran, Icahn School of Medicine  
236 at Mount Sinai), Venus (rabbit PAb sc-8334; Santa Cruz Biotech.), mCherry (rabbit PAb;  
237 Raybiotech), and Nluc (rabbit PAb; Promega). A MAb against actin (MAb AC-15;  
238 Sigma) was included as a loading control. Primary antibodies bound to the membrane  
239 were detected using horseradish peroxidase (HRP)-conjugated secondary antibodies  
240 against mouse or rabbit (GE Healthcare). Proteins were detected by  
241 chemiluminescence using SuperSignal West Femto Maximum Sensitivity Substrate  
242 (Thermo Scientific) based on the manufacturer's specifications and imaged in a  
243 ChemiDoc imaging system (Bio-Rad).

#### 244 **Plaque assays and immunostaining**

245 Confluent monolayers of Vero E6 cells ( $1.2 \times 10^6$  cells/well, 6-well plate format,  
246 triplicates) were infected with WT or reporter-expressing rSARS-CoV-2 for 1 h at 37°C.  
247 After viral absorption, infected cells were overlaid with agar and incubated at 37°C for  
248 72 h. Afterwards, cells were submerged in 10% neutral buffered formalin at 4°C for 16 h  
249 for fixation and viral inactivation, and then the agar overlays were gently removed. To  
250 observe Venus and mCherry fluorescence expression, PBS was added to each well and  
251 plates were imaged under a fluorescence microscope (EVOS M5000 imaging system).  
252 For immunostaining, plates were permeabilized with 0.5% Triton X-100 PBS for 10 min

253 at room temperature, blocked with 2.5% BSA PBS for 1 h at room temperature, and  
254 then incubated at 37°C for 1 h using the anti-SARS 2 NP MAb 1C7. Plaques were  
255 developed for visualization using the Vectastain ABC kit and DAB HRP Substrate kit  
256 (Vector laboratories), in accordance to the manufacturer's recommendations.

### 257 **Viral growth kinetics and titrations**

258 Vero E6 cells ( $1.2 \times 10^6$  cells/well, 6-well plate format, triplicates) were infected (MOI  
259 of 0.01) with rSARS-CoV-2/WT or rSARS-CoV-2 expressing Venus, mCherry, or Nluc.  
260 After viral adsorption for 1 h at 37°C, cells were washed with PBS, provided with fresh  
261 post-infection media, and then placed in a 37°C incubator with 5% CO<sub>2</sub> atmosphere. At  
262 the indicated times post-infection (12, 24, 48, 72, and 96 h), cells were imaged for  
263 Venus or mCherry expression under a fluorescence microscope (EVOS M5000 imaging  
264 system). Viral titers in the tissue culture supernatants at each time point were  
265 determined by titration and immunostaining, as previously described, using the anti-  
266 SARS-CoV NP MAb 1C7. Nluc expression in tissue culture supernatants was quantified  
267 using Nano-Glo luciferase substrate (Promega) following the manufacturer's  
268 recommendations. Mean values and standard deviation (SD) were determined using  
269 GraphPad Prism software (version 8.2).

### 270 **Reporter-based microneutralization assay for the identification of antivirals**

271 Vero E6 cells (96-well plate format,  $4 \times 10^4$  cells/well, quadruplicates) were infected  
272 with ~100-200 PFU of rSARS-CoV-2/WT or rSARS-CoV-2 expressing Venus, mCherry,  
273 or Nluc for 1 h at 37°C. After viral adsorption, cells were washed and incubated in 100  
274  $\mu$ L of infection media (DMEM with 2% FBS) containing 3-fold serial dilutions (starting  
275 concentration of 50  $\mu$ M) of Remdesivir, or 0.1% DMSO vehicle control, and 1% avicel

276 (Sigma-Aldrich). Cells infected with rSARS-CoV-2/WT or rSARS-CoV-2 expressing  
277 fluorescent Venus or mCherry were incubated at 37°C for 24 h, while cells infected with  
278 rSARS-CoV-2 expressing Nluc were incubated at 37°C for 48 h. For rSARS-CoV-2/WT  
279 and rSARS-CoV-2 expressing fluorescent Venus and mCherry, cells were submerged in  
280 10% neutral buffered formalin at 4°C for 16 h for fixation and viral inactivation. Cells  
281 were washed with 100 µl/well of PBS three times, permeabilized with 100 µl/well of  
282 0.5% Triton X-100 in PBS at room temperature for 15 min and blocked with 100 µl/well  
283 of 2.5% BSA in PBS at 37°C for 1 h. Next, cells were staining with the anti-NP MAb 1C7  
284 (1µg/mL) in 1% BSA PBS at 37°C for 1 h. After incubation with the primary MAb, cells  
285 were washed with PBS three times, and a secondary fluorescein isothiocyanate (FITC)-  
286 conjugated goat anti-mouse IgG (Dako; 1:200) in 1% BSA were added to cells for 1 h at  
287 37°C. Cell nuclei were stained with 4',6'-diamidino-2-phenylindole (DAPI, Research  
288 Organics). Viral infections were determined using fluorescent images of each well and  
289 quantified using a cell image analysis software, Cell Profiler (Broad Institute). In the  
290 case of cells infected with rSARS-CoV-2 expressing Nluc, tissue culture supernatants  
291 were collected at 48 h post-infection and Nluc expression was measured using a  
292 luciferase assay and a Synergy LX microplate reader (BioTek). Individual wells from  
293 three independent experiments conducted in quadruplicates were used to calculate the  
294 average and standard deviation (SD) of viral inhibition using Microsoft Excel software.  
295 Non-linear regression curves and the half maximal effective concentration (EC<sub>50</sub>) of  
296 Remdesivir was determined using GraphPad Prism software (version 8.2).

297 **Reporter-based microneutralization assay for the identification of NABs**

298 To test the neutralizing activity of 1212C2, a human MAb recently described to  
299 neutralize SARS-CoV-2 (27), confluent monolayers of Vero E6 cells (96-plate format, 4  
300  $\times 10^4$  cells/well, quadruplicates) were infected with ~100-200 PFU of rSARS-CoV-2/WT  
301 or rSARS-CoV-2 expressing Venus, mCherry, or Nluc for 1 h at 37°C. After viral  
302 adsorption, cells were washed and incubated with 100  $\mu$ L of infection media (DMEM 2%  
303 FBS) containing 3-fold serial dilutions (starting concentration of 500 ng) of 1212C2 or  
304 PBS, and 1% avicel (Sigma-Aldrich). Infected cells were incubated at 37°C for 24 h for  
305 rSARS-CoV-2/WT, or rSARS-CoV expressing Venus or mCherry, and 48 h for rSARS-  
306 CoV-2 expressing Nluc. After viral infections, cells infected with rSARS-CoV-2/WT and  
307 rSARS-CoV-2 expressing fluorescent Venus and mCherry were submerged in 10%  
308 neutral buffered formalin at 4°C for 16 h for fixation and viral inactivation. Cells were  
309 washed with 100  $\mu$ L/well of PBS three times, permeabilized with 100  $\mu$ L/well of 0.5%  
310 Triton X-100 in PBS at room temperature for 15 min. Then, cells were blocked with 100  
311  $\mu$ L/well of 2.5% BSA in PBS at 37°C for 1 h. Cells were next incubated with the anti-NP  
312 MAb 1C7 (1 $\mu$ g/ml) in 1% BSA PBS at 37°C for 1 h. Cells were next washed three times  
313 with PBS and incubated with a secondary fluorescein isothiocyanate (FITC)-conjugated  
314 goat anti-mouse IgG (Dako; 1:200) in 1% BSA for 1 h at 37°C. Cell nuclei were stained  
315 with 4',6'-diamidino-2-phenylindole (DAPI, Research Organics). Viral infections were  
316 determined using fluorescent images of each well and quantified using a cell image  
317 analysis software, Cell Profiler (Broad Institute). In the case of cells infected with  
318 rSARS-CoV-2 expressing Nluc, tissue culture supernatants were collected at 48 h post-  
319 infection and Nluc expression was measured using a luciferase assay and a Synergy  
320 LX microplate reader (BioTek). Individual wells from three independent experiments

321 conducted in quadruplicates were used to calculate the average and standard deviation  
322 (SD) of viral inhibition using Microsoft Excel software. Non-linear regression curves and  
323 the half maximal neutralizing concentration (NT<sub>50</sub>) of 1212C2 was determined using  
324 GraphPad Prism software (version 8.2).

### 325 **Genetic stability**

326 Vero E6 cells (1.2 x 10<sup>6</sup> cells/well, 6-well plate format, triplicates) were infected (MOI  
327 of 0.01) with rSARS-CoV-2-Venus or -mCherry P3 stocks and after 1 h viral adsorption,  
328 virus inoculum was replaced with infectious media (DMEM 2% FBS). The cells were  
329 incubated at 37°C with 5% CO<sub>2</sub> until 70% cytopathic effect (CPE) was observed. Then,  
330 tissue culture supernatants were collected and diluted 100-fold in infectious media and  
331 used to infect fresh Vero E6 cells (1.2 x 10<sup>6</sup> cells/well, 6-well format, triplicates) for two  
332 additional passages (P5). Venus- and mCherry-expressing plaques (~50 counted  
333 plaques per viral passage) were evaluated by immunostaining and fluorescent protein  
334 expression. Viral plaques were imaged under a fluorescence microscope (EVOS M5000  
335 imaging system) under 4X magnification.

336

337

338

339

340

341

342

343

344

345

346

347

348

349

350

351

## 352 **Results**

### 353 **Generation of rSARS-CoV-2 expressing reporter genes**

354 The pBeloBAC11 plasmid encoding the full-length viral genome of SARS-CoV-2 was  
355 previously described (19). To generate the reporter-expressing rSARS-CoV-2, the 7a  
356 open reading frame (ORF) was substituted with Venus, mCherry, or Nluc gene in the  
357 pBeloBAC11 plasmid encoding the remaining viral genome to produce pBeloBAC11-  
358 SARS-CoV-2-del7a/Venus, -del7a/mCherry, or -del7a/Nluc plasmids for viral rescues.  
359 We then used our previously described BAC-based reverse genetics approach to  
360 rescue rSARS-CoV-2-Venus, -mCherry, and -Nluc (**Figure 1A**).

361 We confirmed the rescue of rSARS-CoV-2 expressing -Venus, -mCherry, or -Nluc  
362 reporter genes by RT-PCR using total RNA from mock-, rSARS-CoV-2/WT- or rSARS-  
363 CoV-2 reporter virus-infected cells using primers specific for the viral NP, the ORF7a  
364 region, or the individual reporter genes (**Figure 1B**). As expected, primers specific for  
365 SARS-CoV-2 NP amplified a band of ~1260 bp from the RNA extracted from rSARS-  
366 CoV-2-infected but not mock-infected cells (**Figure 1B**). Amplified bands using primers



367 in the ORF7a region resulted in the expected ~566 bp in cells infected with rSARS-CoV-  
368 2/WT and ~ 920, 911, and 815 bp in the case of cells infected with rSARS-CoV-2-  
369 Venus, -mCherry and -Nluc, respectively, based on the different size of the reporter  
370 genes (**Figure 1B**). Primers specific for the reporter genes only results in the RT-PCR  
371 amplification of bands from cells infected with the respective reporter-expressing  
372 rSARS-CoV-2 (**Figure 1B**). These results demonstrate that substitution of the viral  
373 ORF7a for Venus, mCherry, or Nluc genes results in the successful recovery of rSARS-  
374 CoV-2 containing these reporter genes.

### 375 **Characterization of rSARS-CoV-2 expressing reporter genes**

376 Next, we characterize the reporter-expressing rSARS-CoV-2 by evaluating the  
377 expression levels of Venus, mCherry, or Nluc in cell cultures, and compared them to  
378 those of cells infected with rSARS-CoV-2/WT (**Figure 2**). The rSARS-CoV-2 expressing  
379 Venus and mCherry were directly visualized under a fluorescence microscope (**Figure**  
380 **2A**). Indirect immunofluorescence microscopy using a MAbs against SARS-CoV NP was  
381 used to detect rSARS-CoV-2/WT infection (**Figure 2A**). As expected, Venus or mCherry  
382 expression were only observed in Vero E6 cells infected with rSARS-CoV-2 expressing  
383 Venus or mCherry, respectively, but not in cells infected with rSARS-CoV-2/WT (**Figure**  
384 **2A**). Importantly, only cells infected with rSARS-CoV-2-Venus or rSARS-CoV-2-  
385 mCherry were detected using green or red filters, respectively (data not shown). As  
386 expected, the viral NP was detected in cells infected with rSARS-CoV-2-WT, -Venus, or  
387 -mCherry (**Figure 2A**). Expression of Nluc in rSARS-CoV-2-Nluc-infected cells was  
388 evaluated from tissue culture supernatants at 48 h post-infection (**Figure 2B**). High  
389 levels of Nluc expression were detected in culture supernatants of cells infected with

390 rSARS-CoV-2-Nluc but not from mock or rSARS-CoV-2/WT infected cells (**Figure 2B**).  
391 These results demonstrate that Vero E6 cells infected with rSARS-CoV-2-Venus, -  
392 mCherry, or -Nluc expresses the corresponding reporter genes and that viral infections  
393 can be detected by fluorescence (rSARS-CoV-2-Venus or -mCherry) or luciferase  
394 (rSARS-CoV-2-Nluc) without the need of antibodies that were required for the detection  
395 of rSARS-CoV-2/WT.

396 We next evaluated reporter protein expression levels by Western blot assay using  
397 cell lysates from either mock, rSARS-CoV-2-WT, or rSARS-CoV-2-Venus, -mCherry, or  
398 -Nluc infected cells using MAbs against the viral NP, the reporter genes, or actin as a  
399 loading control (**Figure 2C**). As expected, reporter gene expression was detected in cell  
400 lysates of cells infected with the respective reporter-expressing rSARS-CoV-2 but not  
401 from mock or rSARS-CoV-2-WT infected cells. Viral NP expression was detected in cell  
402 lysates from all virus-infected cells, but not mock-infected cells (**Figure 2C**).

403 Next, we assessed reporter gene expression over a period of 96 h in cells that were  
404 mock-infected (data not shown) or cells infected with WT or reporter-expressing rSARS-  
405 CoV-2 (**Figure 3**). Venus and mCherry expression levels were determined using  
406 fluorescence microscope (**Figure 3A**), while Nluc activity in tissue culture supernatants  
407 from infected cells was detected using a luminometer (**Figure 3B**). Venus and mCherry  
408 expression were detected as early as 24 h post-infection and fluorescent protein  
409 expression increased over time until 96 h post-infection where a decrease in  
410 fluorescence was observed because of CPE caused by viral infection (brightfield, BF)  
411 (**Figure 3A**). Similar CPE, but not fluorescent expression, was also observed in cells  
412 infected with rSARS-CoV-2/WT (**Figure 3A**). Levels of Nluc expression were also

413 detected as early as 24 h post-infection and increase in a time-dependent matter  
414 **(Figure 3B)**.

415 To assess whether deletion of 7a ORF and insertion of reporter genes compromised  
416 viral fitness in cultured cells, we compared growth kinetics of reporter-expressing  
417 rSARS-CoV-2 to those of rSARS-CoV-2/WT **(Figure 3C)**. We found all the reporter-  
418 expressing rSARS-CoV-2 exhibited similar growth kinetics and peak viral titers of  
419 infection to that of rSARS-CoV-2/WT **(Figure 3C)**, suggesting that deletion of the 7a  
420 ORF and insertion of the reporter genes did not significantly affect viral fitness, at least  
421 in cultured cells. These results also support previous findings with SARS-CoV where  
422 deletion of the 7a ORF and insertion of reporter genes did not impact viral fitness *in vitro*  
423 (28, 29). These results were further confirmed when we evaluate the plaque phenotype  
424 of the rSARS-CoV-2 expressing fluorescent reporter genes and compared them to  
425 those of rSARS-CoV-2/WT **(Figure 3D)**. Similar plaque sizes were observed in Vero E6  
426 cells infected with rSARS-CoV-2/WT and rSARS-CoV-2 expressing Venus or mCherry  
427 **(Figure 3D)**. Notably, Venus-positive or mCherry-positive plaques were only detected in  
428 cells infected with rSARS-CoV-2-Venus or -mCherry, respectively, and not in rSARS-  
429 CoV-2/WT infected cells **(Figure 3D)**. Importantly, fluorescent plaques overlapped with  
430 those detected by immunostaining using the SARS-CoV NP 1C7 MAbs. Similar to the  
431 growth kinetics data, we found no significant differences in the plaque size of reporter-  
432 expressing rSARS-CoV-2 compared to rSARS-CoV-2/WT **(Figure 3D)**.

### 433 **A reporter-based microneutralization assay for the identification of antivirals**

434 To determine the feasibility of using our reporter-expressing rSARS-CoV-2 for the  
435 identification of antivirals, we evaluated the ability of Remdesivir to inhibit SARS-CoV-2

436 in reporter-based microneutralization assays (**Figure 4**). Remdesivir has been  
437 previously described to inhibit SARS-CoV-2 infection and is the only FDA-approved  
438 antiviral for the treatment of SARS-CoV-2 (3, 21, 30). The EC<sub>50</sub> of Remdesivir against  
439 rSARS-CoV-2-Venus (**Figure 4A**, 1.07 μM), -mCherry (**Figure 4B**, 1.78 μM), or Nluc  
440 (**Figure 4C**, 1.79 μM) were similar to those obtained with rSARS-CoV-2/WT (**Figure 4D**,  
441 1.51 μM) and values previously reported in the literature (21). This demonstrates the  
442 feasibility of using these reporter-expressing rSARS-CoV-2 and the reporter-based  
443 assay to easily identify compounds with antiviral activity based on fluorescent or  
444 luciferase expression and without the need of MAbs to detect the presence of the virus  
445 in infected cells.

446

#### 447 **A reporter-based microneutralization assay for the identification of NAbs**

448 We next evaluate the feasibility of using our reporter-expressing rSARS-CoV in a  
449 reporter-based microneutralization assay to identify NAbs against SARS-CoV-2. As  
450 proof of concept, we used a human MAb (1212C2) which we have recently described to  
451 potently bind and neutralize SARS-CoV-2 infection both *in vitro* and *in vivo* (27). The  
452 NT<sub>50</sub> of 1212C2 against rSARS-CoV-2-Venus (**Figure 5A**, 1.94 ng), -mCherry (**Figure**  
453 **5B**, 5.02 ng), or Nluc (**Figure 5C**, 3.67 ng) were similar to those observed with rSARS-  
454 CoV-2/WT (**Figure 5D**, 4.88 ng), and recently reported values (27).

#### 455 **Genetic stability of rSARS-CoV-2 *in vitro***

456 The genetic stability of reporter-expressing recombinant viruses is important to  
457 demonstrate their viability in *in vitro* and/or *in vivo* studies. To evaluate the ability of our  
458 rSARS-CoV-2 to maintain fluorescent reporter gene expression, viruses were

459 consecutively passaged in Vero E6 cells and Venus and mCherry expression were  
460 determined by plaque assay using fluorescent microscopy (**Figure 6A**). To that end, we  
461 evaluated fluorescent expression of over 40 plaques before immunostaining with an  
462 anti-SARS-CoV NP MAb 1C7. We found the Venus and mCherry fluorescent  
463 expression from our rSARS-CoV-2 was genetically stable with nearly 100% of the  
464 plaques analyzed under a fluorescent microscope (**Figure 6A**). We also evaluated the  
465 complete genome sequences of the reporter-expressing rSARS-CoV-2 used in our  
466 studies (P3) with those of additional passages (P4 and P5) using next generation  
467 sequencing (**Figure 6B**). In the case of rSARS-CoV-2/Venus (**Figure 6B, top**), few  
468 variants were found at low frequencies after two additional passages (P5), indicating no  
469 significant changes and/or deletions in the viral genome. However, for rSARS-CoV-  
470 2/mCherry (**Figure 6B, middle**), variants containing a mutation at position 21,784 in the  
471 S gene was found in our viral stock (P3) and the frequency of this mutation increased  
472 after additional passages (P4 and P5). Two additional mutations at positions 23,525 and  
473 24,134 (both in the S gene) were also found at P5. In the case of rSARS-CoV-2/Nluc  
474 (**Figure 6B, bottom**) a mutation at position 24,755 (S gene) was found in our viral stock  
475 (P3). Frequency of this mutation increased up to 100% after 2 additional passage (P5).  
476 Other, less abundant, mutations at positions 13,419 (nsp12, RNA dependent RNA  
477 polymerase), 23,525 (S gene), and 26,256 (envelop, E, gene) were also found after the  
478 additional 2 passages (P5) (**Figure 6B, bottom**). It is possible that these mutations are  
479 most likely due to viral adaptation to Vero E6 cells but since different mutations were  
480 found in the three reporter-expressing rSARS-CoV-2, it is also possible that these  
481 mutations are related to the nature of the reporter gene. In any case, these results

482 indicate that the reporter-expressing rSARS-CoV-2 are genetically stable in Vero E6  
483 cells.

484

485

486

487

488

489

490

491

492

493

#### 494 **Discussion**

495 Reporter-expressing viruses represent a powerful tool for both basic research and  
496 translational studies (14, 15, 31-34). Several research groups, including ours, have  
497 previously described recombinant viruses expressing reporter genes to easily study the  
498 biology of viral infections, to evaluate the efficacy of antivirals or NABs, and for *in vivo*  
499 studies in validated animal models (35-49).

500 Both fluorescent and luciferase proteins have been used to generate reporter-  
501 expressing viruses. However, the innate and differing properties of reporter genes  
502 dictate which one might be inserted into a recombinant virus. While fluorescent proteins  
503 provide an efficient way to track viral infections using microscopy, luciferase proteins  
504 are more readily quantifiable and therefore more amenable to HTS studies (14, 15, 50).

505 For this reason, in this study we generated rSARS-CoV-2 expressing fluorescent  
506 (Venus and mCherry) or luciferase (Nluc) proteins (**Figure 1**). These reporter genes  
507 were selected based on either their distinctive fluorescent properties (Venus and  
508 mCherry) or because of their small size, stability, high bioluminescence activity, and  
509 ATP-independency (Nluc) (51).

510 Although reporter-expressing rSARS-CoV-2 similar to those reported here have  
511 been recently described (16-18), this is the first report of a replicating competent  
512 rSARS-CoV-2 expressing mCherry. Recombinant viruses expressing a red fluorescent  
513 protein represent an advantage over those expressing GFP or mNeonGreen (16-18) in  
514 that many genetically modified cell lines and/or animals express green fluorescent  
515 proteins. Another limitation of green fluorescent proteins during *in vivo* imaging is the  
516 absorption of the fluorophores' excitation and emission by hemoglobin and  
517 autofluorescence of tissues (52-55). Recombinant viruses expressing red fluorescent  
518 proteins represent a better option to combine with genetically modified GFP-expressing  
519 cell lines and/or animals and, based on their reduced autofluorescence background, to  
520 more accurately capture the dynamics of viral infection and replication.

521 Reporter-expressing replicating competent viruses can be used to monitor viral  
522 infections, assess viral fitness, evaluate and/or identify antivirals and/or NAbs, where  
523 reporter gene expression can be used as a valid surrogate for viral detection in infected  
524 cells. Expression of Venus, mCherry, or Nluc from our rSARS-CoV-2 were confirmed  
525 by directly visualizing fluorescence expression under a fluorescent microscope (Venus  
526 and mCherry) or luciferase activity (Nluc) using a microplate reader (**Figures 2 and 3**).  
527 Western blot analyses using specific antibodies against each of the reporter genes

528 further confirm expression from their respective rSARS-CoV-2 (**Figures 2 and 3**).  
529 Notably, despite deletion of the 7a ORF and insertion of a reporter gene, the three  
530 reporter-expressing rSARS-CoV-2 displayed similar growth kinetics and plaque  
531 phenotype than their WT counterpart (**Figure 3**). As expected, viral infection was  
532 visualized in real time, without the need of secondary approaches (e.g. MAbs) to detect  
533 the presence of the virus in infected cells. Overall, reporter gene expression displayed  
534 similar kinetics that correlated with levels of viral replication, further demonstrating the  
535 feasibility of using these reporter genes as a valid surrogate of assess viral infection.

536 Therapeutic treatment of SARS-CoV-2 infections is currently limited to the use of  
537 Remdesivir (3), and despite significant global efforts, there is no preventative vaccine  
538 for the treatment of SARS-CoV-2 infections. Notably, there is a possibility, similar to the  
539 situation with other respiratory viruses (e.g. influenza), of the emergence of drug-  
540 resistant SARS-CoV-2 variants that will impose a significant challenge to the currently  
541 ongoing COVID-19 pandemic (56). Thus, it is imperative to not only discover new  
542 antivirals and other therapeutic approaches but also prophylactics for the treatment of  
543 SARS-CoV-2 infections. To that end, rapid and sensitive screening assays to identify  
544 compounds with antiviral activity or to assess efficacy of vaccine candidates for the  
545 therapeutic and prophylactic treatment of SARS-CoV-2 infections, respectively, are  
546 urgently needed. In this study, we demonstrate that reporter-expressing rSARS-CoV-2  
547 represent an excellent option for the rapid identification and characterization of both  
548 antivirals (**Figure 4**) and NAbs (**Figure 5**) for the therapeutic and/or prophylactic  
549 treatment of SARS-CoV-2 infections. Importantly,  $EC_{50}$  (antivirals) and  $NT_{50}$  (NAbs)  
550 obtained with our reporter-expressing viruses were comparable to those obtained using



551 rSARS-CoV-2/WT or described by others in the literature (17, 21, 27), demonstrating  
552 the feasibility of using our reporter-based microneutralization assays for the rapid  
553 identification of antivirals or NAbs (**Figures 4 and 5**, respectively). Furthermore, our  
554 results indicate that reporter-expressing Venus, mCherry, and Nluc rSARS-CoV-2 are  
555 stable up to 5 passages *in vitro* in Vero E6 cells, including expression of the reporter  
556 gene (**Figure 6**). To date, we have not yet conducted studies to evaluate the feasibility  
557 of using these reporter-expressing rSARS-CoV-2 *in vivo*. It is possible, and similar to  
558 other respiratory viruses, that rSARS-CoV-2 expressing reporter genes could also be  
559 used to study the biology of viral infections in validated animals of viral infection.

560 Our SARS-CoV-2 reverse genetics based on the use of BAC have allowed us to  
561 rescue rSARS-CoV-2/WT (19) and rSARS-CoV-2 stably expressing reporter genes. In  
562 the case of our reporter-expressing rSARS-CoV-2, we removed the 7a ORF and  
563 substituted it for various reporter genes without a significant impact in viral replication.  
564 The feasibility of removing viral genes and insert reporter genes demonstrate the  
565 genetic plasticity of the SARS-CoV-2 genome and open the possibility of generating  
566 recombinant viruses expressing other genes of interest for the development of SARS-  
567 CoV-2 vaccines that could be used for the control of the currently ongoing COVID-19  
568 pandemic.

569

570

571

572

573

574

575

576

577

578

579

580

581

582

583

584

585

586

587 **Acknowledgements**

588 We want to thank Dr. Thomas Moran at the Icahn School of Medicine at Mount Sinai  
589 for providing us with the SARS-CoV cross-reactive NP MAb 1C7. We also want to thank  
590 BEI Resources for providing the SARS-CoV-2 USA-WA1/2020 isolate (NR-52281) and  
591 Marina McDew-White and Robbie Diaz for constructing the NGS libraries. Finally, we  
592 would also like to thank members at our institutes for their efforts in keeping them fully  
593 operational during the COVID-19 pandemic and the BSC and IACUC committees for  
594 reviewing our protocols in a time efficient manner. We would like to dedicate this  
595 manuscript to all COVID-19 victims and to all heroes battling this disease.

596

597

598

599

600

601

602

603

604

605

606

607

608

609

610 **Figure legends:**

611 **Figure 1. rSARS-CoV-2 expressing reporter genes. A) Schematic representation**

612 **of reporter-expressing rSARS-CoV-2:** rSARS-CoV-2 expressing Venus (green box),

613 mCherry (red box), and Nluc (blue box) reporter genes instead of the viral 7a ORF are

614 shown. The molecular size of the three reporter genes are indicated. The location of

615 other viral proteins and untranslated regions (UTR) are also shown. **B) Genetic**

616 **characterization of reporter-expressing rSARS-CoV-2:** Vero E6 cells were mock-

617 infected or infected (MOI 0.01) with WT or reporter-expressing rSARS-CoV-2. At 72 h

618 post-infection, total RNA collected from cells was used to amplify, using RT-PCR, the

619 viral NP, the ORF 7a region, and the different reporter genes (Venus, mCherry or Nluc).

620 Primers used for this RT-PCR analysis are shown in the left. The molecular weight (bp)  
621 of the RT-PCR amplified products is shown on the right.

622 **Figure 2. Characterization of reporter-expressing rSARS-CoV-2. A) Fluorescent**

623 **expression:** Vero E6 cells were mock infected or infected (MOI 0.01) with WT and  
624 Venus- or mCherry-expressing rSARS-CoV-2. At 48 h post-infection, cells were fixed  
625 and permeabilized, visualized for Venus (left) or mCherry (right) expression, and  
626 immunostained with a SARS-CoV NP MAb (1C7). DAPI was used for nuclear staining.

627 Merged images for Venus (left) or mCherry (right), viral NP, and DAPI are illustrated.

628 Representative images (20X magnification) are shown. Scale bar, 100  $\mu$ m. **B) Nluc**

629 **expression:** Vero E6 cells were mock-infected or infected (MOI 0.01) with WT and  
630 Nluc-expressing rSARS-CoV-2. At 48 h post-infection, Nluc expression in tissue culture  
631 supernatants was analyzed using a Synergy LX microplate reader (BioTek). **C)**

632 **Western blot:** Vero E6 cells were mock-infected or infected (MOI 0.01) with WT and  
633 Venus (left), mCherry (center) or Nluc (right) expressing rSARS-CoV-2. At 48 h post-  
634 infection, viral NP and reporter gene protein expression levels were analyzed using  
635 specific antibodies. An antibody against beta-actin was used as internal control. The  
636 size of molecular markers is shown in the right in each of the Western blots.

637 **Figure 3. Viral growth kinetics and plaque phenotype. A) Fluorescent expression:**

638 Vero E6 cells were infected (MOI 0.01) with WT (left), Venus (center), and mCherry  
639 (right) expressing rSARS-CoV-2. At 12, 24, 48, 72, and 96 h post-infection.  
640 fluorescence protein expression was determined using a fluorescent microscope.

641 Representative images (20X magnification) are included. Scale bar, 100  $\mu$ m. **B) Nluc**

642 **expression:** Vero E6 cells were mock-infected or infected (MOI 0.01) with WT and Nluc

643 expressing rSARS-CoV-2. At the indicated times post-infection (12, 24, 48, 72, and 96  
644 h), Nluc expression in the tissue culture supernatants was analyzed using a Synergy LX  
645 microplate reader (BioTek). **C) Growth kinetics:** Vero E6 cells were infected (MOI  
646 0.01) with WT or reporter-expressing rSARS-CoV-2. At 12, 24, 48, 72, and 96 h post-  
647 infection, presence of infectious virus in the tissue culture supernatants was determined  
648 using plaque assay (plaque forming units, PFU/ml). **D) Plaque phenotype:** Vero E6  
649 cells were infected with ~25 PFU of WT (left), Venus (middle), and mCherry (right)  
650 expressing rSARS-CoV-2. At 72 h post-infection, plaques were observed under a  
651 fluorescent microscope to detect Venus or mCherry expression. In the case of rSARS-  
652 CoV-2/WT infected cells, images correspond to fluorescent filters to detect Venus (left)  
653 or mCherry (right) expression. Thereafter, viral plaques were detected using the 1C7  
654 SARS-CoV NP MAbs. A selected number (n=6) of plaques were used to determine the  
655 percentage of viral plaques expressing fluorescent proteins (Venus or mCherry).  
656 Magnification 4x, Scale bar, 750µm.

657 **Figure 4. A reporter-based microneutralization assay for the identification of**  
658 **antivirals:** Vero E6 cells (96-well plate format,  $\sim 4 \times 10^4$  cells/well, triplicates) were  
659 infected with 100 PFU of Venus (**A**), mCherry (**B**), Nluc (**C**), or WT (**D**) rSARS-CoV-2.  
660 After 1 h viral absorption, post-infection media containing 3-fold serial dilutions of  
661 Remdesivir (starting concentration 50 µM) was added to the cells. At 24 h post-infection,  
662 cells were fixed and visualized for Venus (**A**) and mCherry (**B**) expression using a  
663 fluorescent microscope. In the case of cells infected with rSARS-CoV-2 expressing  
664 Nluc, luciferase expression in the tissue culture supernatant was determined at 48 h  
665 post-infection using a luciferase assay and a Synergy LX microplate reader (BioTek)

666 (C). For the detection of rSARS-CoV-2/WT, the amount of virus was determined by  
667 plaque assay using the 1C7 SARS-CoV NP MAb (D). The amount of viral infection for  
668 Venus-, mCherry-, or WT- rSARS-CoV-2 (after IFA) was determined using fluorescent  
669 images of each well and quantified using a cell image analysis software, Cell Profiler  
670 (Broad Institute). Nluc activity was quantified using the Gen5 data analysis software  
671 (BioTek). The 50% effective concentration (CC<sub>50</sub>) of Remdesivir was determined using  
672 Graphpad Prism. Dotted line indicates 50% viral inhibition. Data were expressed as  
673 mean and SD from triplicate wells. Representative images (10X magnification) are  
674 included. Scale bar, 300µm.

675 **Figure 5. A reporter-based microneutralization assay for the identification of**  
676 **NAbs:** Vero E6 cells (96-well plate format, ~4 x 10<sup>4</sup> cells/well, triplicates) were infected  
677 with 100 PFU of Venus (A), mCherry (B), Nluc (C) or WT (D) rSARS-CoV-2. After 1 h  
678 viral absorption, post-infection media containing 3-fold serial dilutions (starting  
679 concentration 500 ng) of a SARS-CoV-2 NAb (1212C2) was added to the cells. At 24 h  
680 post-infection, cells were fixed and visualized for Venus (A) and mCherry (B)  
681 expression using a fluorescent microscope. In the case of cells infected with rSARS-  
682 CoV-2 expressing Nluc, luciferase expression in the tissue culture supernatant was  
683 determined at 48 h post-infection using a luciferase assay and a Synergy LX microplate  
684 reader (BioTek) (C). For the detection of rSARS-CoV-2/WT, the amount of virus was  
685 determined by plaque assay using the 1C7 SARS-CoV NP MAb (D). The amount of  
686 viral infection for Venus-, mCherry-, and WT- rSARS-CoV-2 (after IFA) was determined  
687 using fluorescent images of each well and quantified using a cell image analysis  
688 software, Cell Profiler (Broad Institute). Nluc was quantified using the BioTek Gen5 data

689 analysis software. The 50% neutralizing titer (NT<sub>50</sub>) of 1212C2 was determined using  
690 Graphpad Prism. Dotted line indicates 50% viral neutralization. Data were expressed as  
691 mean and SD from triplicate wells. Representative images (10X magnification) are  
692 included. Scale bar, 300µm.

693 **Figure 6. Genetic stability of fluorescent-expressing rSARS-CoV-2. A) Plaque**

694 **assay:** Fluorescent-expressing rSARS-CoV-2 were passaged up to 5 times in Vero E6  
695 cells and infectious virus-containing tissue culture supernatants from passages 3 to 5  
696 (P3-P5) were assessed for Venus or mCherry expression at 72 h post-infection, before  
697 immunostaining with the SARS-CoV NP MAb 1C7. The percentage of reporter-  
698 expressing viruses was determined from ~40-50 viral plaques per passage.

699 Representative images of immunostaining and fluorescence (4X magnification, scale  
700 bar, 750 µm) obtained from each P3-P5 viral plaques are shown. **B) Sequence**

701 **analysis:** Reporter-expressing rSARS-CoV-2 non-reference allele frequencies from  
702 virus stock (P3) and after two consecutive passages in Vero cells (P4 and P5) were  
703 determined using next generation sequencing, using modified rSARS-CoV-2/WT  
704 reference genomes. Non-reference alleles that were below 1% of reads are not shown  
705 and those greater than 20% are indicated in red.

706

707

708

709

710

711

712

713

714

715

716

717

718

719

720

721

722

723

724

725

726

727 **References**

- 728 1. Zhu N, Zhang D, Wang W, Li X, Yang B, Song J, Zhao X, Huang B, Shi W, Lu R,  
729 Niu P, Zhan F, Ma X, Wang D, Xu W, Wu G, Gao GF, Tan W, China Novel  
730 Coronavirus I, Research T. 2020. A Novel Coronavirus from Patients with  
731 Pneumonia in China, 2019. *N Engl J Med* 382:727-733.
- 732 2. Dong E, Du H, Gardner L. 2020. An interactive web-based dashboard to track  
733 COVID-19 in real time. *Lancet Infect Dis* 20:533-534.



- 734 3. Beigel JH, Tomashek KM, Dodd LE, Mehta AK, Zingman BS, Kalil AC, Hohmann  
735 E, Chu HY, Luetkemeyer A, Kline S, Lopez de Castilla D, Finberg RW, Dierberg  
736 K, Tapson V, Hsieh L, Patterson TF, Paredes R, Sweeney DA, Short WR,  
737 Touloumi G, Lye DC, Ohmagari N, Oh MD, Ruiz-Palacios GM, Benfield T,  
738 Fätkenheuer G, Kortepeter MG, Atmar RL, Creech CB, Lundgren J, Babiker AG,  
739 Pett S, Neaton JD, Burgess TH, Bonnett T, Green M, Makowski M, Osinusi A,  
740 Nayak S, Lane HC, Members A-SG. 2020. Remdesivir for the Treatment of  
741 Covid-19 - Final Report. *N Engl J Med* doi:10.1056/NEJMoa2007764.
- 742 4. Su S, Wong G, Shi W, Liu J, Lai ACK, Zhou J, Liu W, Bi Y, Gao GF. 2016.  
743 Epidemiology, Genetic Recombination, and Pathogenesis of Coronaviruses.  
744 *Trends Microbiol* 24:490-502.
- 745 5. Ludwig S, Zarbock A. 2020. Coronaviruses and SARS-CoV-2: A Brief Overview.  
746 *Anesth Analg* 131:93-96.
- 747 6. de Wit E, van Doremalen N, Falzarano D, Munster VJ. 2016. SARS and MERS:  
748 recent insights into emerging coronaviruses. *Nat Rev Microbiol* 14:523-34.
- 749 7. Ksiazek TG, Erdman D, Goldsmith CS, Zaki SR, Peret T, Emery S, Tong S,  
750 Urbani C, Comer JA, Lim W, Rollin PE, Dowell SF, Ling AE, Humphrey CD,  
751 Shieh WJ, Guarner J, Paddock CD, Rota P, Fields B, DeRisi J, Yang JY, Cox N,  
752 Hughes JM, LeDuc JW, Bellini WJ, Anderson LJ, Group SW. 2003. A novel  
753 coronavirus associated with severe acute respiratory syndrome. *N Engl J Med*  
754 348:1953-66.
- 755 8. Cui J, Li F, Shi ZL. 2019. Origin and evolution of pathogenic coronaviruses. *Nat*  
756 *Rev Microbiol* 17:181-192.

- 757 9. Stoye E. 2020. The pandemic in pictures: how coronavirus is changing the world.  
758 Nature.
- 759 10. Qian X, Ren R, Wang YF, Guo Y, Fang J, Wu ZD, Liu PL, Han TR, Comm MS,  
760 Hlth SG, Assoc CPM. 2020. Fighting against the common enemy of COVID-19: a  
761 practice of building a community with a shared future for mankind. *Infectious*  
762 *Diseases of Poverty* 9.
- 763 11. Vellingiri B, Jayaramayya K, Iyer M, Narayanasamy A, Govindasamy V,  
764 Giridharan B, Ganesan S, Venugopal A, Venkatesan D, Ganesan H,  
765 Rajagopalan K, Rahman PKSM, Cho SG, Kumar NS, Subramaniam MD. 2020.  
766 COVID-19: A promising cure for the global panic. *Science of the Total*  
767 *Environment* 725.
- 768 12. Jones L, Walsh K, Willcox M, Morgan P, Nichols J. 2020. The COVID-19  
769 pandemic: Important considerations for contact lens practitioners. *Contact Lens*  
770 *& Anterior Eye* 43:196-203.
- 771 13. Ciotti M, Angeletti S, Minieri M, Giovannetti M, Benvenuto D, Pascarella S,  
772 Sagnelli C, Bianchi M, Bernardini S, Ciccozzi M. 2019. COVID-19 Outbreak: An  
773 Overview. *Chemotherapy* 64:215-223.
- 774 14. Nogales A, Rodriguez-Sanchez I, Monte K, Lenschow DJ, Perez DR, Martinez-  
775 Sobrido L. 2016. Replication-competent fluorescent-expressing influenza B virus.  
776 *Virus Res* 213:69-81.
- 777 15. Nogales A, Avila-Perez G, Rangel-Moreno J, Chiem K, DeDiego ML, Martinez-  
778 Sobrido L. 2019. A Novel Fluorescent and Bioluminescent Bireporter Influenza A  
779 Virus To Evaluate Viral Infections. *J Virol* 93.

- 780 16. Hou YJ, Okuda K, Edwards CE, Martinez DR, Asakura T, Dinnon KH, 3rd, Kato  
781 T, Lee RE, Yount BL, Mascenik TM, Chen G, Olivier KN, Ghio A, Tse LV, Leist  
782 SR, Gralinski LE, Schafer A, Dang H, Gilmore R, Nakano S, Sun L, Fulcher ML,  
783 Livraghi-Butrico A, Nicely NI, Cameron M, Cameron C, Kelvin DJ, de Silva A,  
784 Margolis DM, Markmann A, Bartelt L, Zumwalt R, Martinez FJ, Salvatore SP,  
785 Borczuk A, Tata PR, Sontake V, Kimple A, Jaspers I, O'Neal WK, Randell SH,  
786 Boucher RC, Baric RS. 2020. SARS-CoV-2 Reverse Genetics Reveals a  
787 Variable Infection Gradient in the Respiratory Tract. *Cell* 182:429-446 e14.
- 788 17. Xie X, Muruato AE, Zhang X, Lokugamage KG, Fontes-Garfias CR, Zou J, Liu J,  
789 Ren P, Balakrishnan M, Cihlar T, Tseng C-TK, Makino S, Menachery VD, Bilello  
790 JP, Shi P-Y. 2020. A nanoluciferase SARS-CoV-2 for rapid neutralization testing  
791 and screening of anti-infective drugs for COVID-19. *bioRxiv*  
792 doi:10.1101/2020.06.22.165712:2020.06.22.165712.
- 793 18. Xie X, Muruato A, Lokugamage KG, Narayanan K, Zhang X, Zou J, Liu J,  
794 Schindewolf C, Bopp NE, Aguilar PV, Plante KS, Weaver SC, Makino S, LeDuc  
795 JW, Menachery VD, Shi PY. 2020. An Infectious cDNA Clone of SARS-CoV-2.  
796 *Cell Host Microbe* 27:841-848 e3.
- 797 19. Ye C, Chiem K, Park JG, Oladunni F, Platt RN, 2nd, Anderson T, Almazan F, de  
798 la Torre JC, Martinez-Sobrido L. 2020. Rescue of SARS-CoV-2 from a Single  
799 Bacterial Artificial Chromosome. *mBio* 11.
- 800 20. Avila-Perez G, Park JG, Nogales A, Almazan F, Martinez-Sobrido L. 2019.  
801 Rescue of Recombinant Zika Virus from a Bacterial Artificial Chromosome cDNA  
802 Clone. *J Vis Exp* doi:10.3791/59537.

- 803 21. Park JG, Oladunni FS, Chiem K, Ye C, Pipenbrink M, Moran T, Walter MR, Kobie  
804 J, Martinez-Sobrido L. 2020. Rapid in vitro assays for screening neutralizing  
805 antibodies and antivirals against SARS-CoV-2. *J Virol Methods*  
806 doi:10.1016/j.jviromet.2020.113995:113995.
- 807 22. Chiem K, Ye C, Martinez-Sobrido L. 2020. Generation of Recombinant SARS-  
808 CoV-2 Using a Bacterial Artificial Chromosome. *Curr Protoc Microbiol* 59:e126.
- 809 23. Bolger AM, Lohse M, Usadel B. 2014. Trimmomatic: a flexible trimmer for  
810 Illumina sequence data. *Bioinformatics* 30:2114-20.
- 811 24. Langmead B, Salzberg SL. 2012. Fast gapped-read alignment with Bowtie 2. *Nat*  
812 *Methods* 9:357-9.
- 813 25. Pedersen BS, Quinlan AR. 2018. Mosdepth: quick coverage calculation for  
814 genomes and exomes. *Bioinformatics* 34:867-868.
- 815 26. Wilm A, Aw PP, Bertrand D, Yeo GH, Ong SH, Wong CH, Khor CC, Petric R,  
816 Hibberd ML, Nagarajan N. 2012. LoFreq: a sequence-quality aware, ultra-  
817 sensitive variant caller for uncovering cell-population heterogeneity from high-  
818 throughput sequencing datasets. *Nucleic Acids Res* 40:11189-201.
- 819 27. Piepenbrink MS, Park J-G, Oladunni FS, Deshpande A, Basu M, Sarkar S, Loos  
820 A, Woo J, Lovalenti P, Sloan D, Ye C, Chiem K, Erdmann NB, Goepfert PA,  
821 Truong VL, Walter MR, Martinez-Sobrido L, Kobie JJ. 2020. Therapeutic activity  
822 of an inhaled potent SARS-CoV-2 neutralizing human monoclonal antibody in  
823 hamsters. bioRxiv doi:10.1101/2020.10.14.339150:2020.10.14.339150.
- 824 28. Narayanan K, Huang C, Makino S. 2008. SARS coronavirus accessory proteins.  
825 *Virus Res* 133:113-21.

- 826 29. Sims AC, Baric RS, Yount B, Burkett SE, Collins PL, Pickles RJ. 2005. Severe  
827 acute respiratory syndrome coronavirus infection of human ciliated airway  
828 epithelia: role of ciliated cells in viral spread in the conducting airways of the  
829 lungs. *J Virol* 79:15511-24.
- 830 30. Wang M, Cao R, Zhang L, Yang X, Liu J, Xu M, Shi Z, Hu Z, Zhong W, Xiao G.  
831 2020. Remdesivir and chloroquine effectively inhibit the recently emerged novel  
832 coronavirus (2019-nCoV) in vitro. *Cell Res* 30:269-271.
- 833 31. Li X, Zhang H, Zhang Y, Li J, Wang Z, Deng C, Jardim ACG, Terzian ACB,  
834 Nogueira ML, Zhang B. 2019. Development of a rapid antiviral screening assay  
835 based on eGFP reporter virus of Mayaro virus. *Antiviral Res* 168:82-90.
- 836 32. Kirui J, Freed EO. 2020. Generation and validation of a highly sensitive  
837 bioluminescent HIV-1 reporter vector that simplifies measurement of virus  
838 release. *Retrovirology* 17:12.
- 839 33. Shang B, Deng C, Ye H, Xu W, Yuan Z, Shi PY, Zhang B. 2013. Development  
840 and characterization of a stable eGFP enterovirus 71 for antiviral screening.  
841 *Antiviral Res* 97:198-205.
- 842 34. Zou G, Xu HY, Qing M, Wang QY, Shi PY. 2011. Development and  
843 characterization of a stable luciferase dengue virus for high-throughput  
844 screening. *Antiviral Res* 91:11-9.
- 845 35. Avilov SV, Moisy D, Munier S, Schraidt O, Naffakh N, Cusack S. 2012.  
846 Replication-competent influenza A virus that encodes a split-green fluorescent  
847 protein-tagged PB2 polymerase subunit allows live-cell imaging of the virus life  
848 cycle. *J Virol* 86:1433-48.

- 849 36. Breen M, Nogales A, Baker SF, Martínez-Sobrido L. 2016. Replication-  
850 Competent Influenza A Viruses Expressing Reporter Genes. *Viruses* 8.
- 851 37. Breen M, Nogales A, Baker SF, Perez DR, Martinez-Sobrido L. 2016.  
852 Replication-Competent Influenza A and B Viruses Expressing a Fluorescent  
853 Dynamic Timer Protein for In Vitro and In Vivo Studies. *PLoS One* 11:e0147723.
- 854 38. Czako R, Vogel L, Lamirande EW, Bock KW, Moore IN, Ellebedy AH, Ahmed R,  
855 Mehle A, Subbarao K. 2017. In Vivo Imaging of Influenza Virus Infection in  
856 Immunized Mice. *MBio* 8.
- 857 39. Eckert N, Wrensch F, Gartner S, Palanisamy N, Goedecke U, Jager N,  
858 Pohlmann S, Winkler M. 2014. Influenza A virus encoding secreted Gaussia  
859 luciferase as useful tool to analyze viral replication and its inhibition by antiviral  
860 compounds and cellular proteins. *PLoS One* 9:e97695.
- 861 40. Fukuyama S, Katsura H, Zhao D, Ozawa M, Ando T, Shoemaker JE, Ishikawa I,  
862 Yamada S, Neumann G, Watanabe S, Kitano H, Kawaoka Y. 2015. Multi-spectral  
863 fluorescent reporter influenza viruses (Color-flu) as powerful tools for in vivo  
864 studies. *Nat Commun* 6:6600.
- 865 41. Heaton NS, Leyva-Grado VH, Tan GS, Eggink D, Hai R, Palese P. 2013. In vivo  
866 bioluminescent imaging of influenza a virus infection and characterization of  
867 novel cross-protective monoclonal antibodies. *J Virol* 87:8272-81.
- 868 42. Karlsson EA, Meliopoulos VA, Savage C, Livingston B, Mehle A, Schultz-Cherry  
869 S. 2015. Visualizing real-time influenza virus infection, transmission and  
870 protection in ferrets. *Nat Commun* 6:6378.

- 871 43. Manicassamy B, Manicassamy S, Belicha-Villanueva A, Pisanelli G, Pulendran  
872 B, García-Sastre A. 2010. Analysis of in vivo dynamics of influenza virus infection  
873 in mice using a GFP reporter virus. *Proc Natl Acad Sci U S A* 107:11531-6.
- 874 44. Martinez-Sobrido L, Cadagan R, Steel J, Basler CF, Palese P, Moran TM,  
875 Garcia-Sastre A. 2010. Hemagglutinin-pseudotyped green fluorescent protein-  
876 expressing influenza viruses for the detection of influenza virus neutralizing  
877 antibodies. *J Virol* 84:2157-63.
- 878 45. Nogales A, Baker SF, Martinez-Sobrido L. 2014. Replication-competent influenza  
879 A viruses expressing a red fluorescent protein. *Virology* 476C:206-216.
- 880 46. Nogales A, Rodriguez-Sanchez I, Monte K, Lenschow DJ, Perez DR, Martinez-  
881 Sobrido L. 2015. Replication-competent fluorescent-expressing influenza B virus.  
882 *Virus Res* 213:69-81.
- 883 47. Perez JT, Garcia-Sastre A, Manicassamy B. 2013. Insertion of a GFP reporter  
884 gene in influenza virus. *Curr Protoc Microbiol* Chapter 15:Unit 15G 4.
- 885 48. Reuther P, Gopfert K, Dudek AH, Heiner M, Herold S, Schwemmler M. 2015.  
886 Generation of a variety of stable Influenza A reporter viruses by genetic  
887 engineering of the NS gene segment. *Sci Rep* 5:11346.
- 888 49. Tran V, Poole DS, Jeffery JJ, Sheahan TP, Creech D, Yevtodiyeenko A, Peat AJ,  
889 Francis KP, You S, Mehle A. 2015. Multi-Modal Imaging with a Toolbox of  
890 Influenza A Reporter Viruses. *Viruses* 7:5319-27.
- 891 50. Welsh DK, Noguchi T. 2012. Cellular bioluminescence imaging. *Cold Spring*  
892 *Harb Protoc* 2012.

- 893 51. Hall MP, Unch J, Binkowski BF, Valley MP, Butler BL, Wood MG, Otto P,  
894 Zimmerman K, Vidugiris G, Machleidt T, Robers MB, Benink HA, Eggers CT,  
895 Slater MR, Meisenheimer PL, Klaubert DH, Fan F, Encell LP, Wood KV. 2012.  
896 Engineered luciferase reporter from a deep sea shrimp utilizing a novel  
897 imidazopyrazinone substrate. *ACS Chem Biol* 7:1848-57.
- 898 52. Luker KE, Pata P, Shemiakina II, Pereverzeva A, Stacer AC, Shcherbo DS,  
899 Pletnev VZ, Skolnaja M, Lukyanov KA, Luker GD, Pata I, Chudakov DM. 2015.  
900 Comparative study reveals better far-red fluorescent protein for whole body  
901 imaging. *Sci Rep* 5:10332.
- 902 53. Shcherbo D, Merzlyak EM, Chepurnykh TV, Fradkov AF, Ermakova GV,  
903 Solovieva EA, Lukyanov KA, Bogdanova EA, Zaraisky AG, Lukyanov S,  
904 Chudakov DM. 2007. Bright far-red fluorescent protein for whole-body imaging.  
905 *Nat Methods* 4:741-6.
- 906 54. Yang M, Baranov E, Jiang P, Sun FX, Li XM, Li L, Hasegawa S, Bouvet M, Al-  
907 Tuwajri M, Chishima T, Shimada H, Moossa AR, Penman S, Hoffman RM. 2000.  
908 Whole-body optical imaging of green fluorescent protein-expressing tumors and  
909 metastases. *Proc Natl Acad Sci U S A* 97:1206-11.
- 910 55. Tam JM, Upadhyay R, Pittet MJ, Weissleder R, Mahmood U. 2007. Improved in  
911 vivo whole-animal detection limits of green fluorescent protein-expressing tumor  
912 lines by spectral fluorescence imaging. *Mol Imaging* 6:269-76.
- 913 56. Lo MK, Albariño CG, Perry JK, Chang S, Tchesnokov EP, Guerrero L,  
914 Chakrabarti A, Shrivastava-Ranjan P, Chatterjee P, McMullan LK, Martin R,  
915 Jordan R, Götte M, Montgomery JM, Nichol ST, Flint M, Porter D, Spiropoulou



916 CF. 2020. Remdesivir targets a structurally analogous region of the Ebola virus  
917 and SARS-CoV-2 polymerases. Proc Natl Acad Sci U S A  
918 doi:10.1073/pnas.2012294117.

919

A)

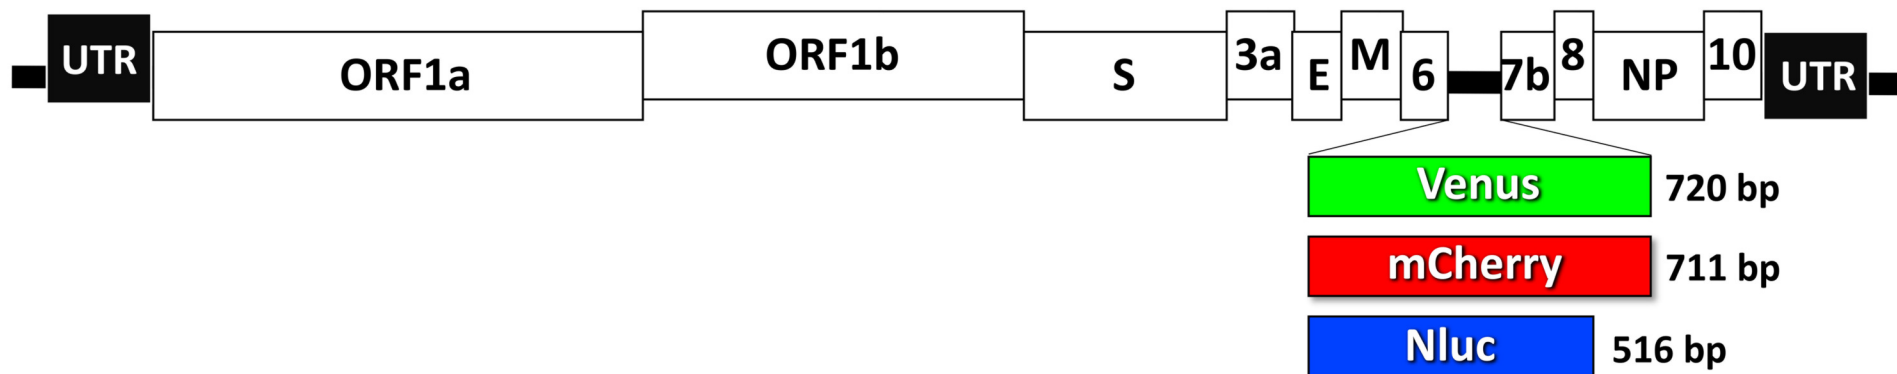

B)

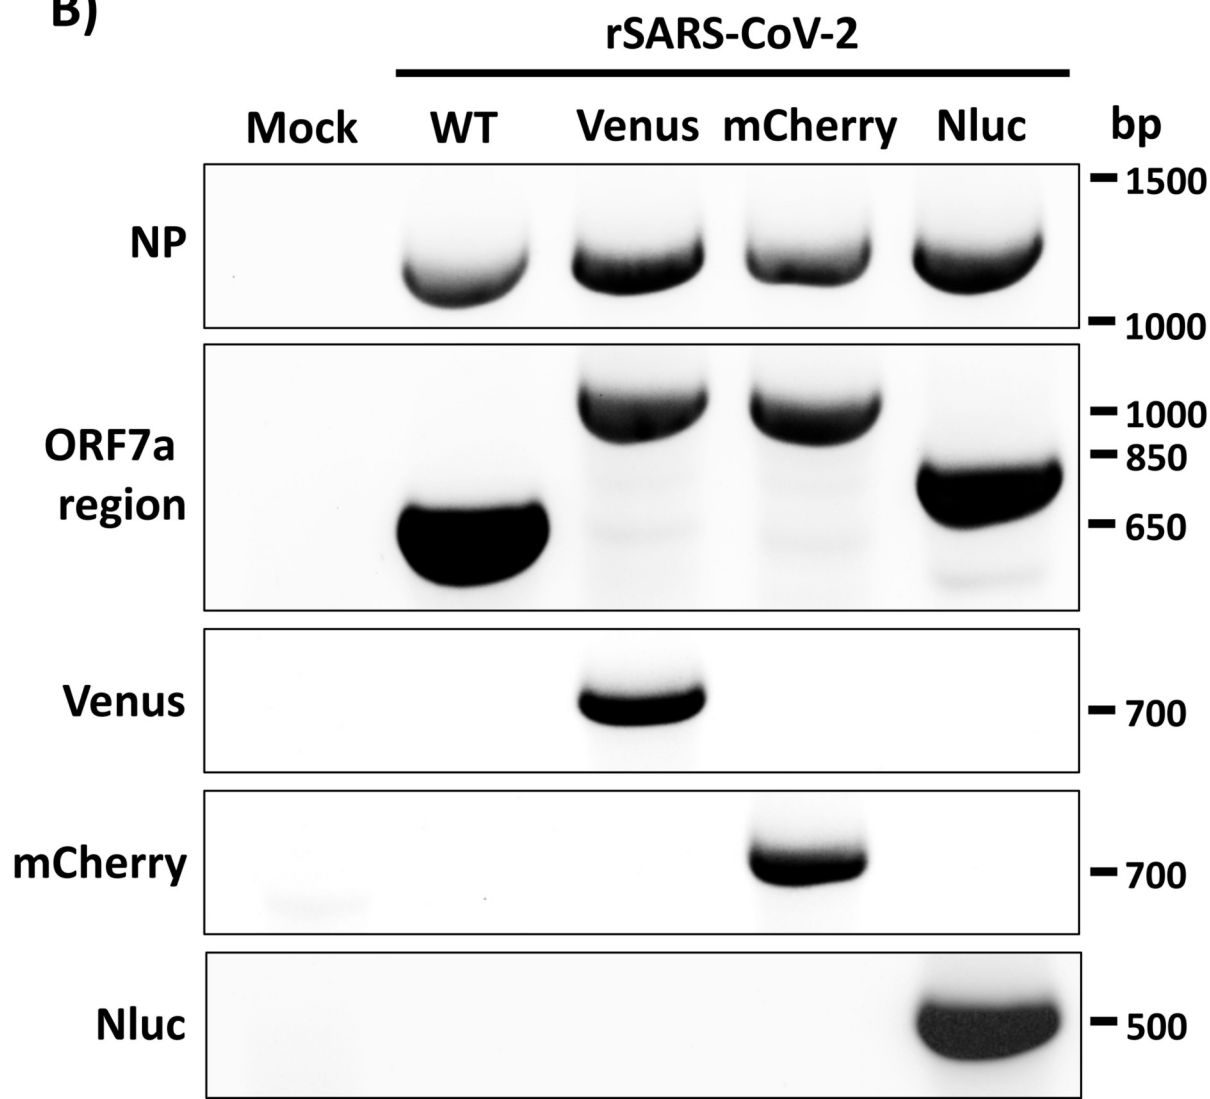

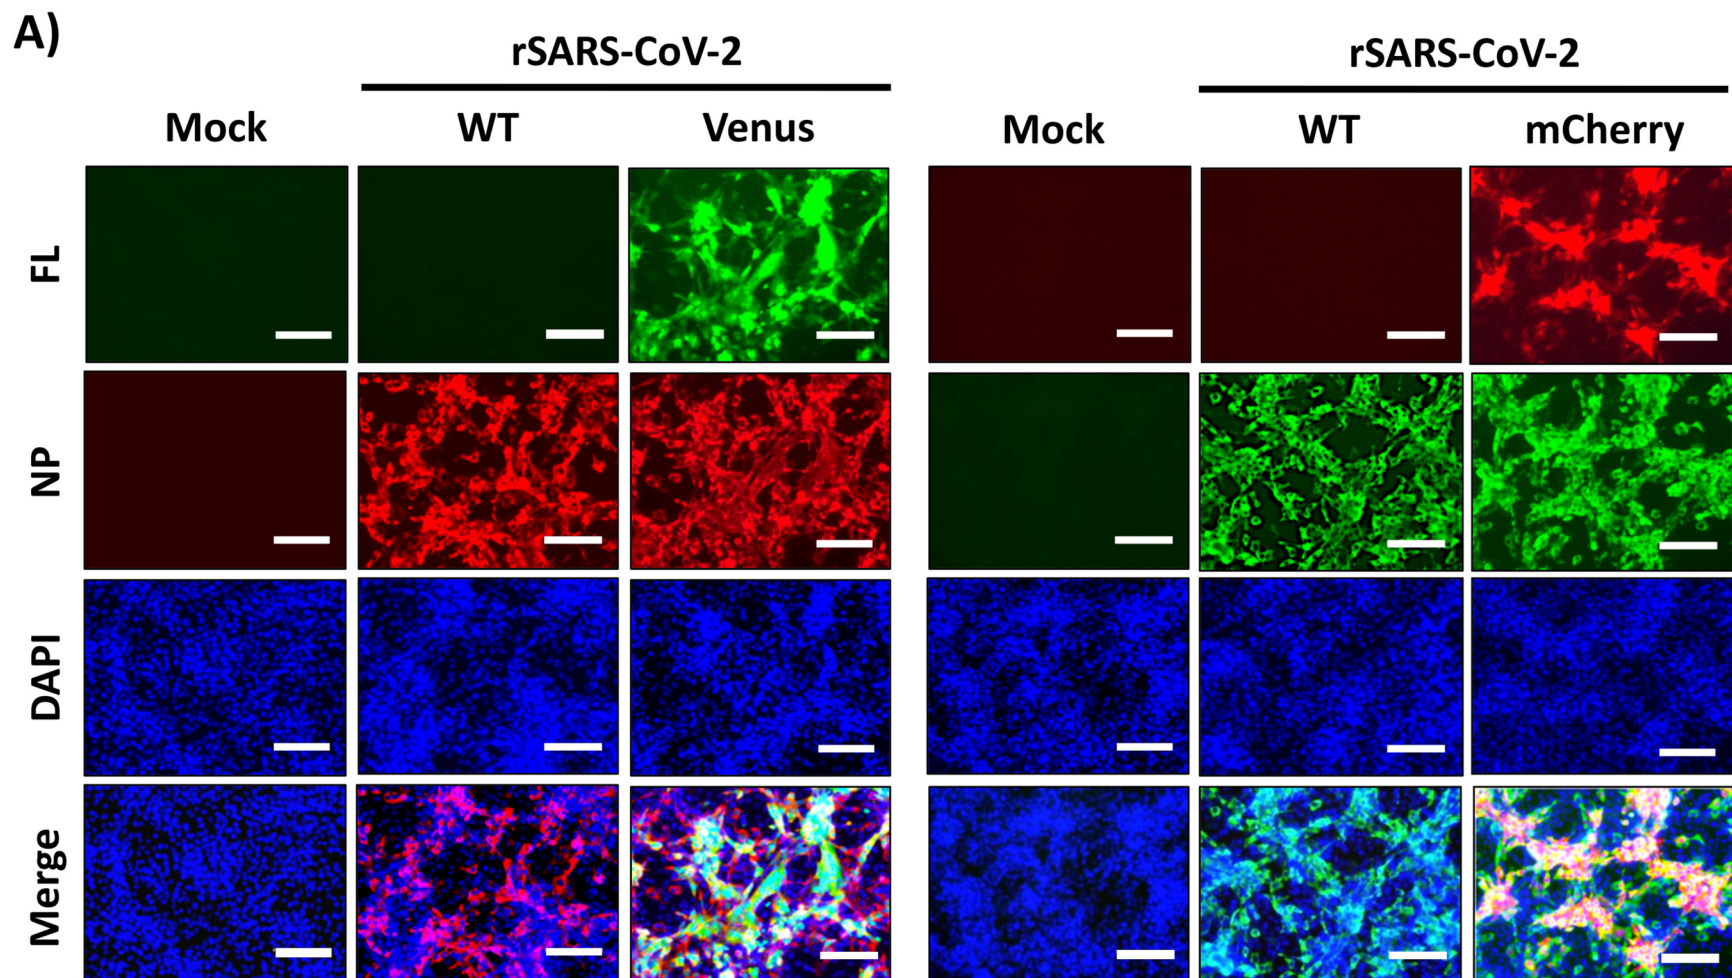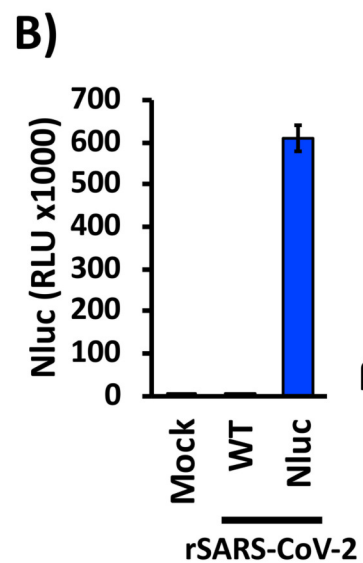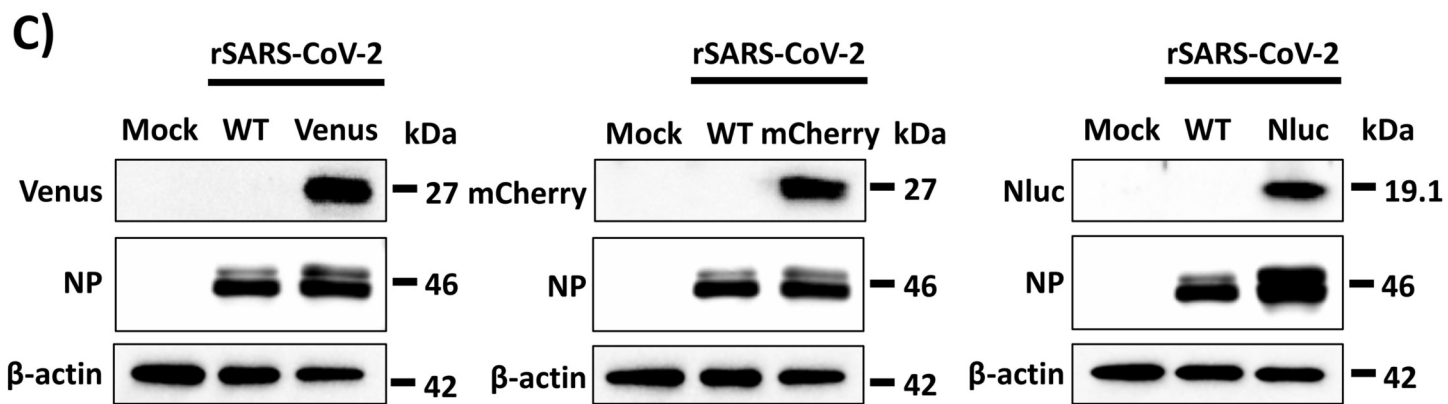

A)

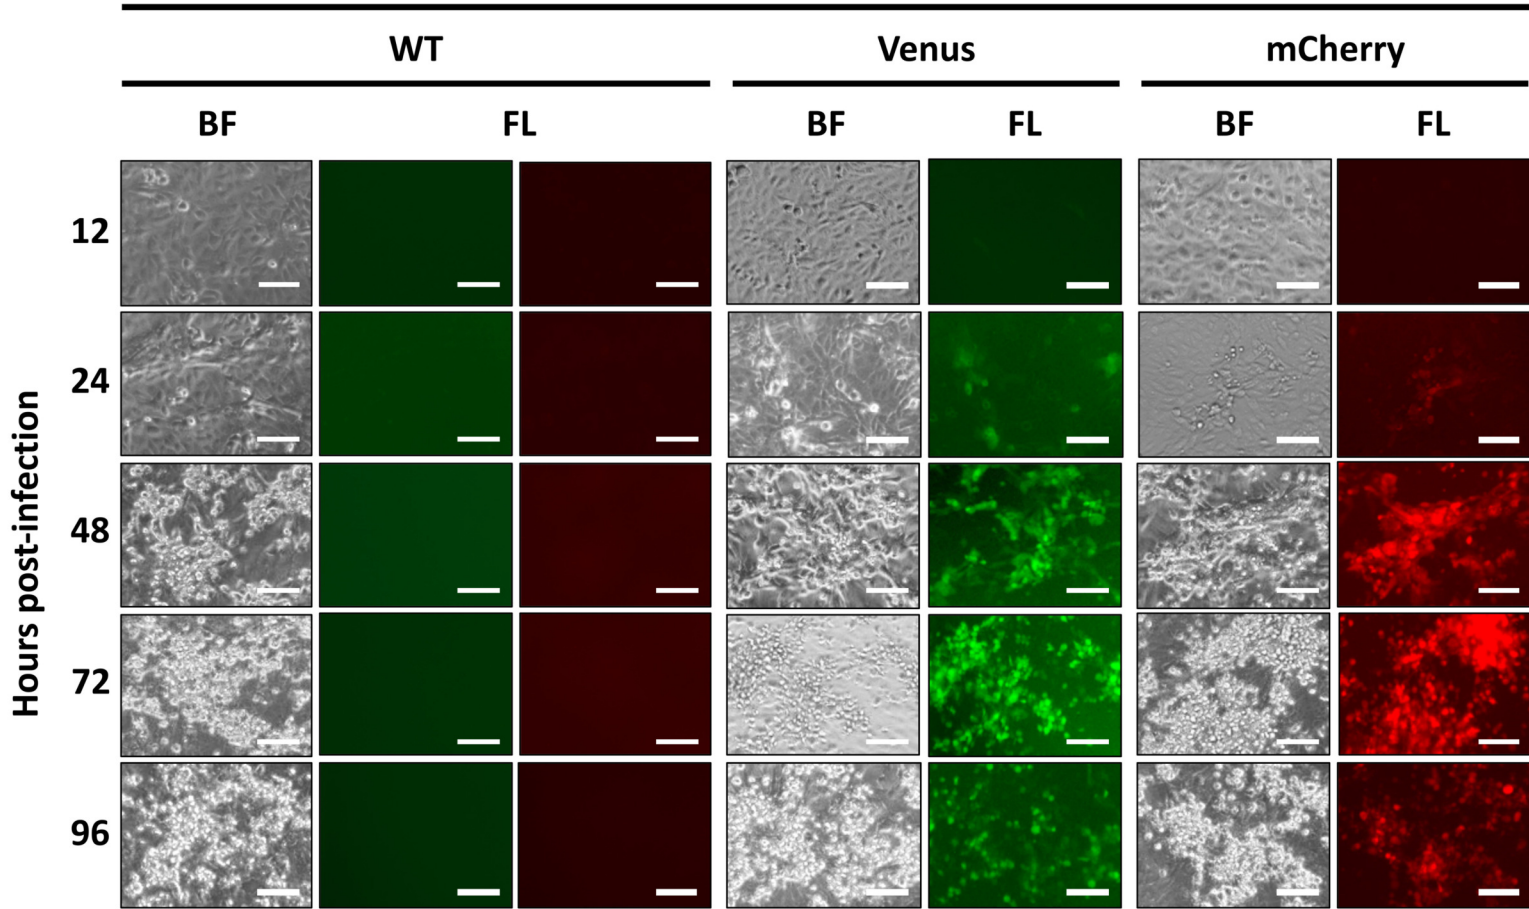

B)

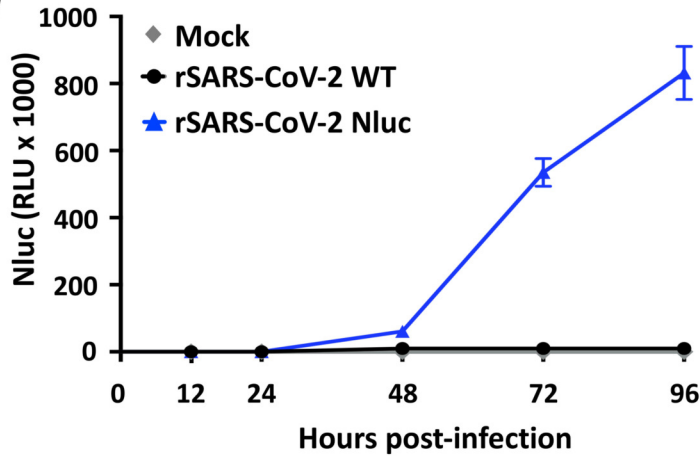

C)

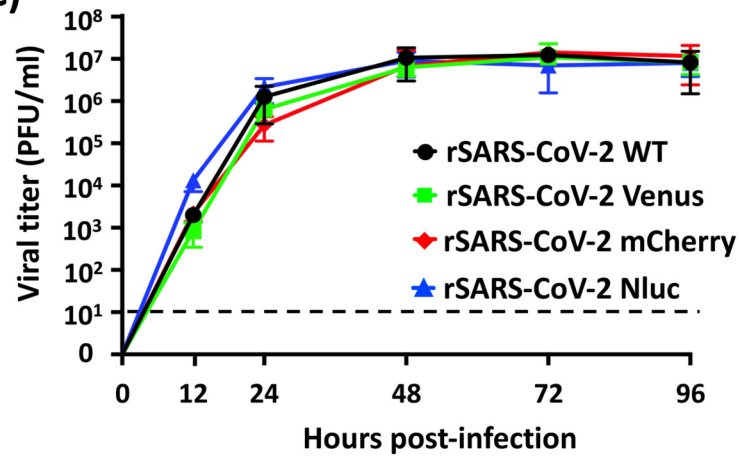

D)

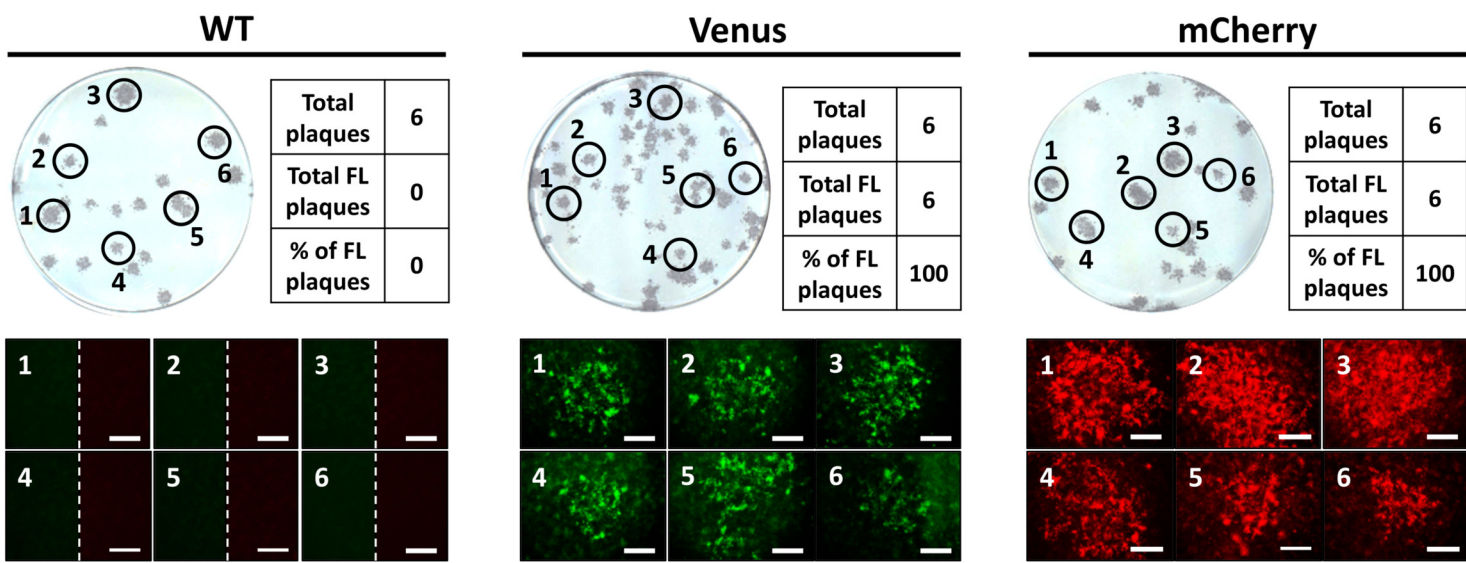

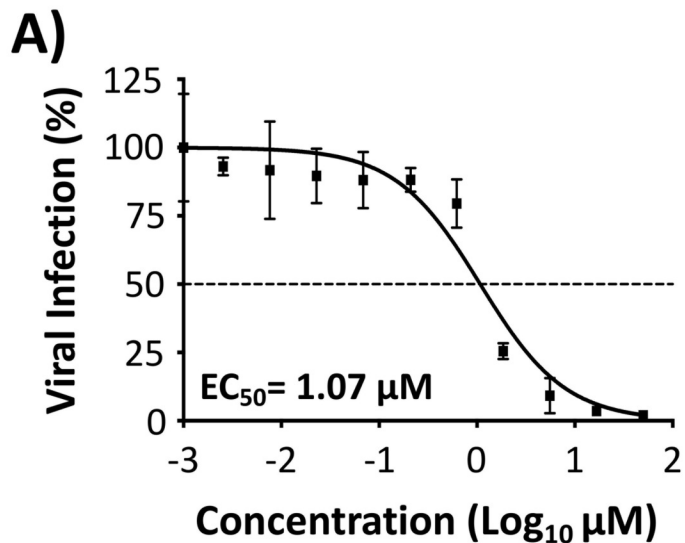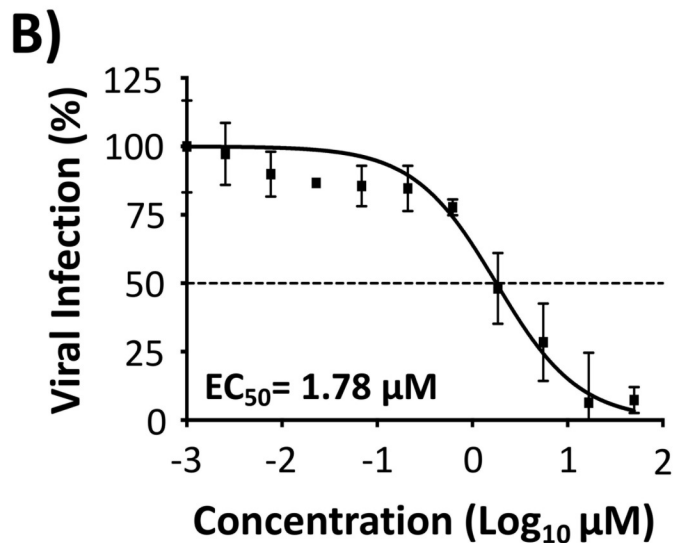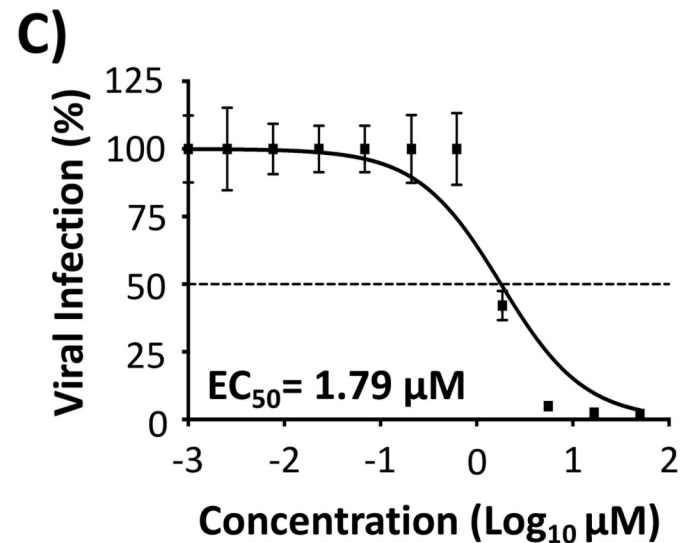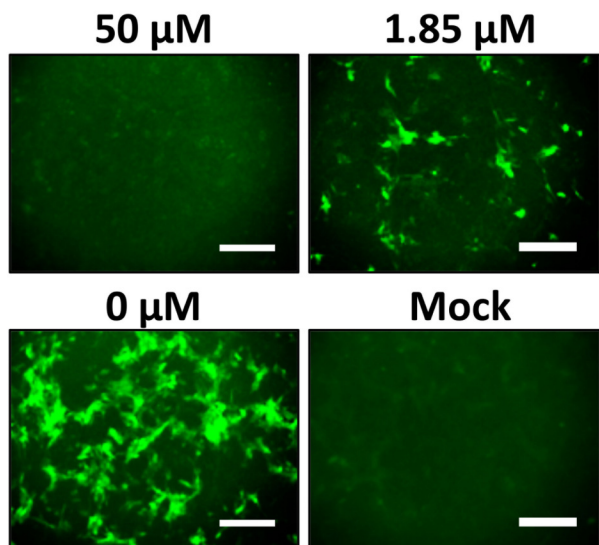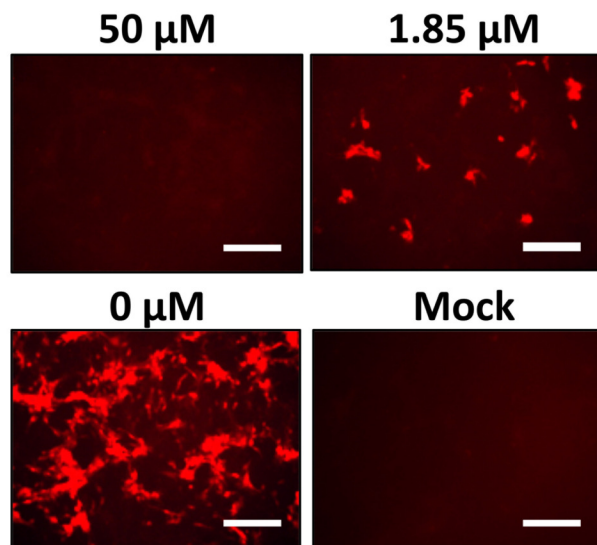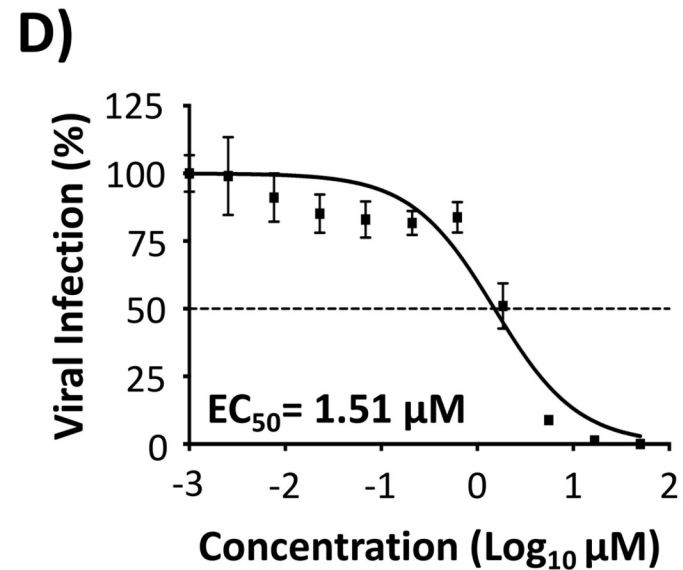

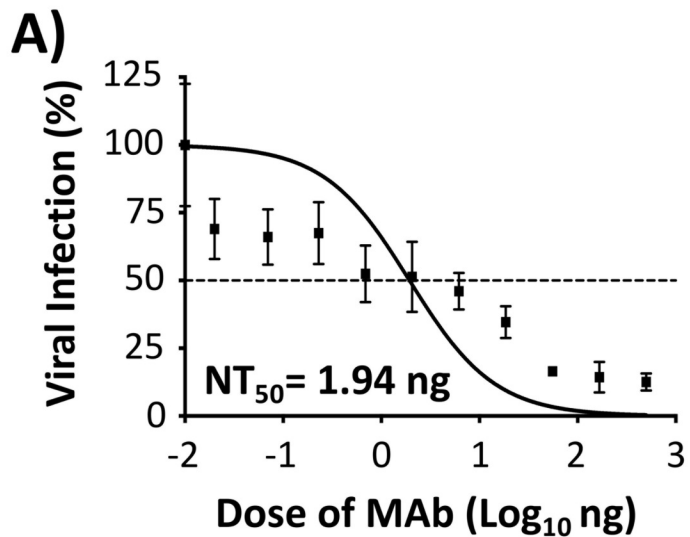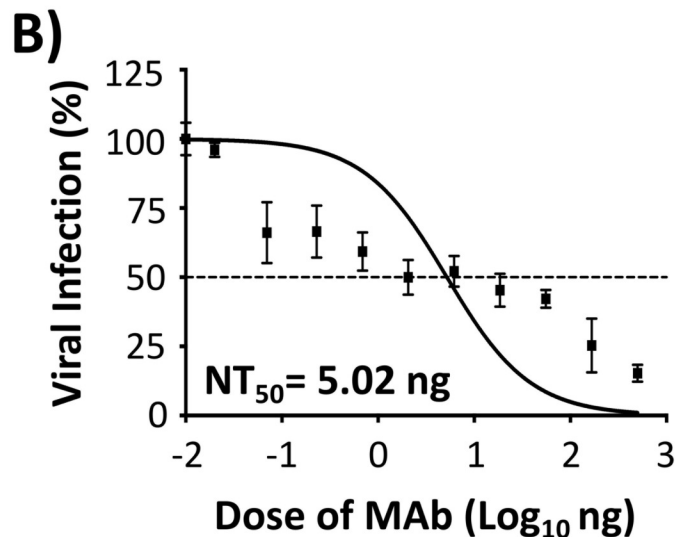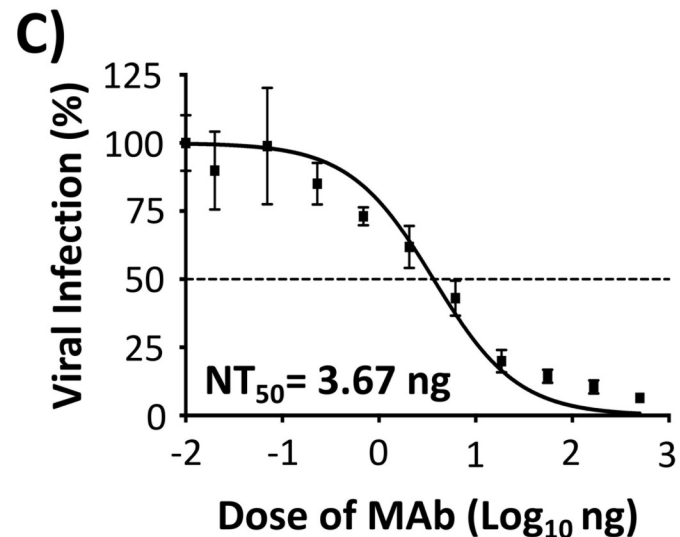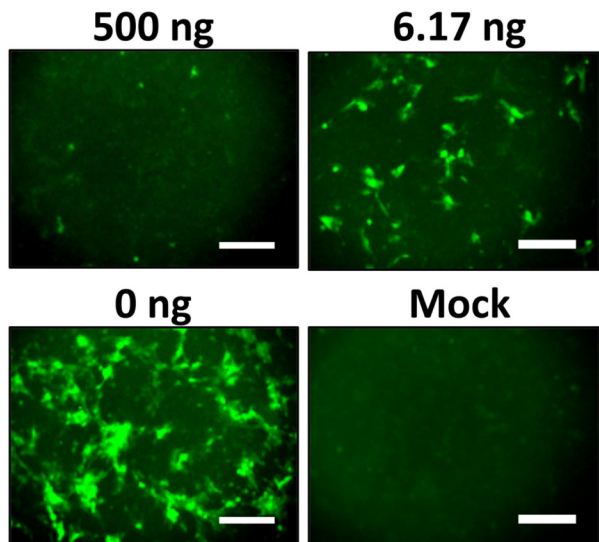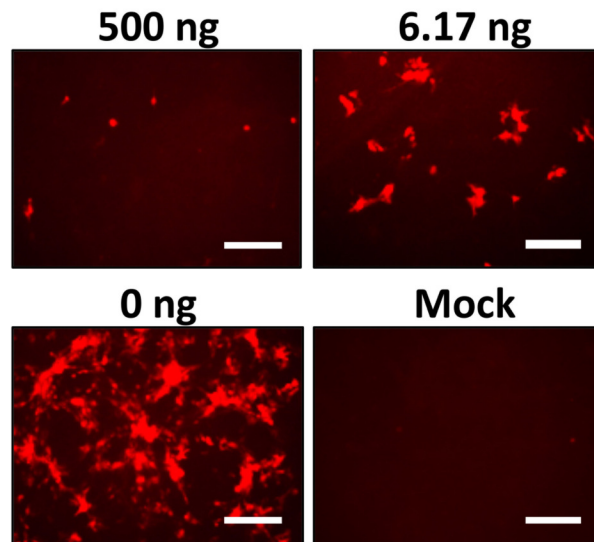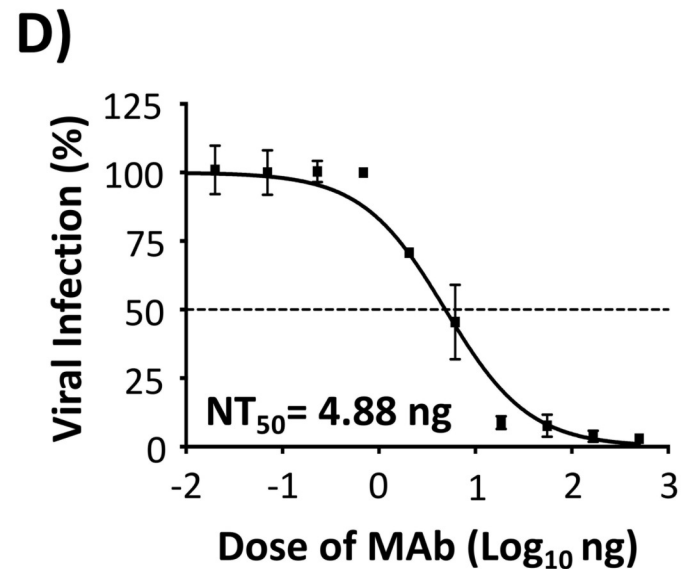

**A)**

rSARS-CoV-2 Venus

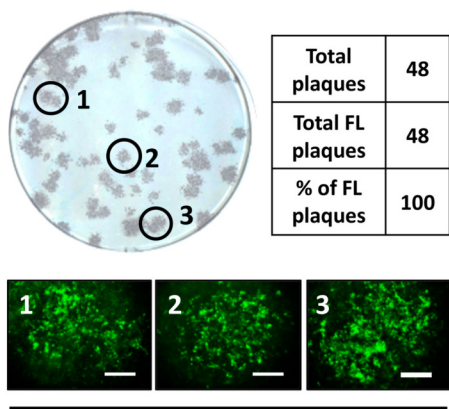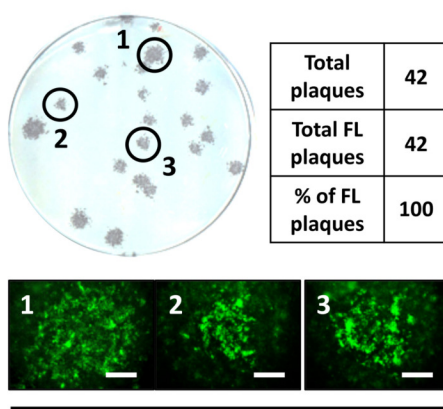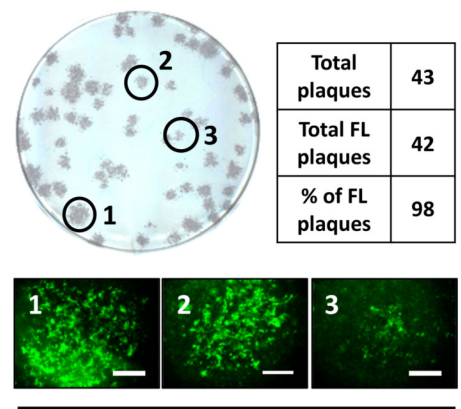

rSARS-CoV-2 mCherry

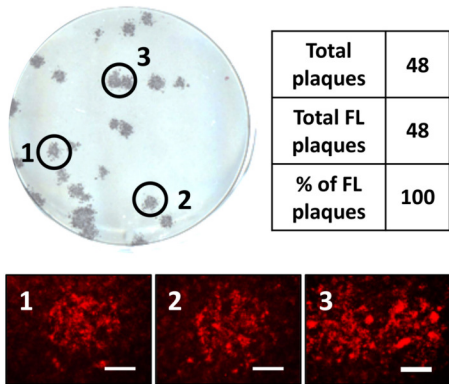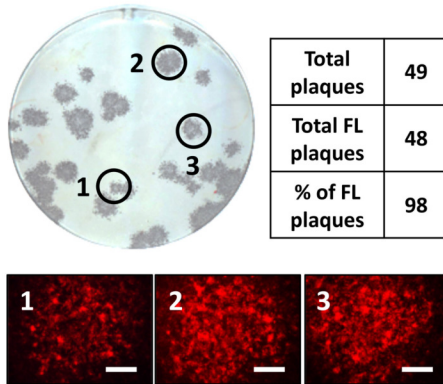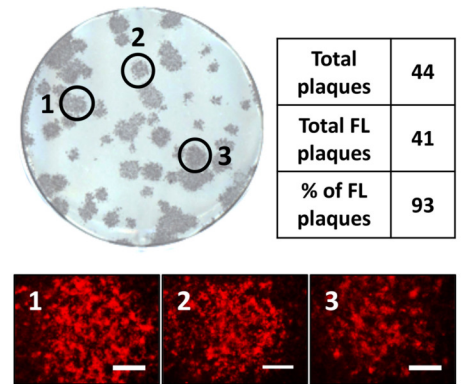

**B)**

rSARS-CoV-2 Venus

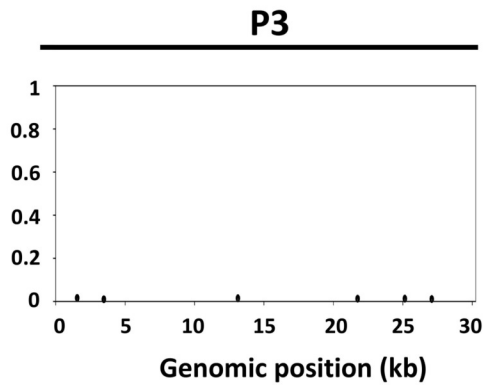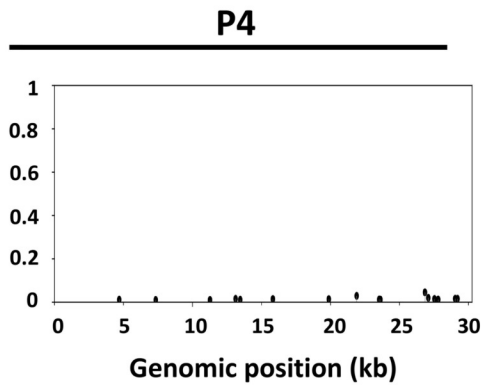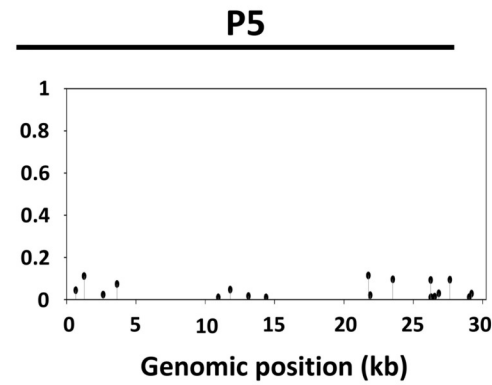

rSARS-CoV-2 mCherry

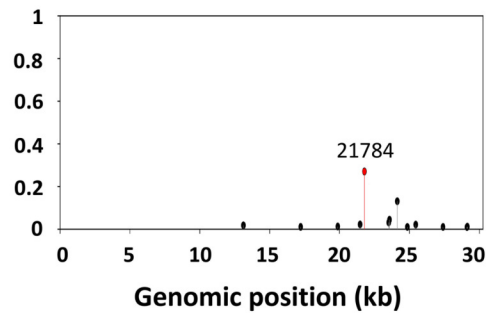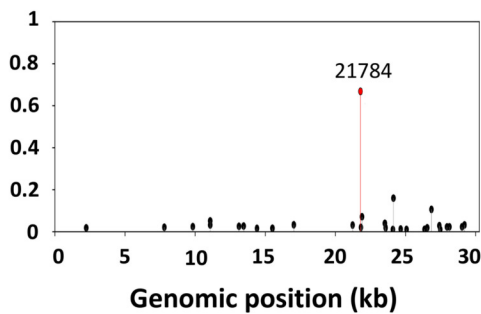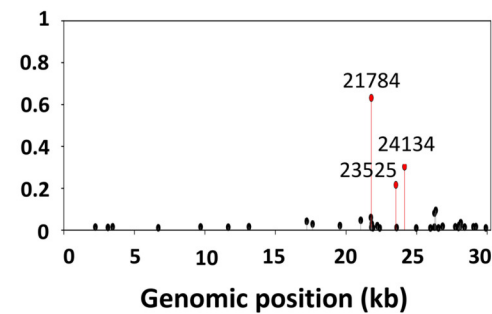

rSARS-CoV-2 Nuc

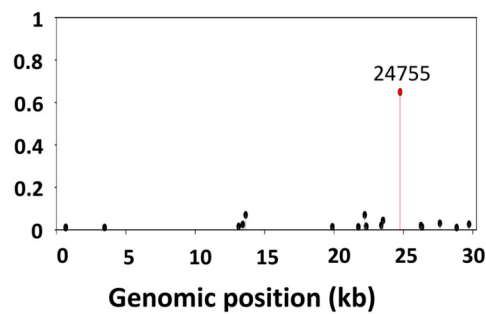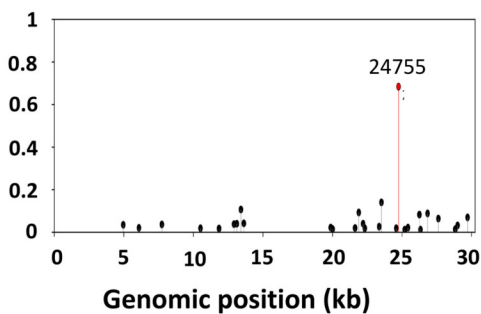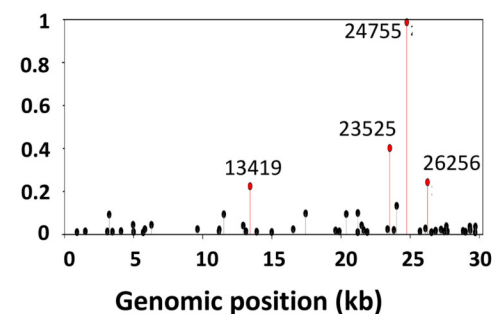

Source: https://www.biorxiv.org/content/10.1101/2020.11.16.386003v1.full.pdf
